1 **Genetic Modification to Design a Stable Yeast-expressed Recombinant SARS-CoV-2 Receptor Binding**  
2 **Domain as a COVID-19 Vaccine Candidate**

3  
4 Wen-Hsiang Chen<sup>ab</sup>, Junfei Wei<sup>a</sup>, Rakhi Tyagi Kundu<sup>a</sup>, Rakesh Adhikari<sup>a</sup>, Zhuyun Liu<sup>a</sup>, Jungsoon Lee<sup>a</sup>, Leroy  
5 Versteeg<sup>a</sup>, Cristina Poveda<sup>a</sup>, Brian Keegan<sup>a</sup>, Maria Jose Villar<sup>a</sup>, Ana C. de Araujo Leao<sup>a</sup>, Joanne Altieri  
6 Rivera<sup>a</sup>, Portia M. Gillespie<sup>a</sup>, Jeroen Pollet<sup>ab</sup>, Ulrich Strych<sup>ab</sup>, Bin Zhan<sup>ab</sup>, Peter J. Hotez<sup>abcd\*</sup>, Maria Elena  
7 Bottazzi<sup>abcd\*</sup>

8  
9 <sup>a</sup>Texas Children's Hospital Center for Vaccine Development, Houston, TX, USA

10 <sup>b</sup> Departments of Pediatrics and Molecular Virology & Microbiology; National School of Tropical  
11 Medicine; Baylor College of Medicine, Houston, TX, USA

12 <sup>c</sup>Department of Biology, Baylor University, Waco, TX, USA

13 <sup>d</sup> James A. Baker III Institute for Public Policy, Rice University, Houston, TX, USA

14

15 correspondence:

16 \*Maria Elena Bottazzi [bottazzi@bcm.edu](mailto:bottazzi@bcm.edu), 1102 Bates St., Ste. 550 | Houston, TX 77030

17 \*Peter J Hotez [hotez@bcm.edu](mailto:hotez@bcm.edu), 1 Baylor Plaza, Houston TX 77030

18  
19  
20  
21  
22  
23  
24  
25  
26  
27  
28  
29  
30  
31  
32  
33  
34  
35  
36  
37

38  
39  
40  
41  
42  
43  
44  
45  
46  
47  
48  
49  
50  
51  
52  
53  
54  
55  
56  
57  
58  
59  
60  
61  
62  
63  
64  
65  
66  
67  
68

**ABSTRACT**

*Background:* Coronavirus disease 2019 (COVID-19) caused by SARS-CoV-2 has now spread worldwide to infect over 110 million people, with approximately 2.5 million reported deaths. A safe and effective vaccine remains urgently needed.

*Method:* We constructed three variants of the recombinant receptor-binding domain (RBD) of the SARS-CoV-2 spike (S) protein (residues 331-549) in yeast as follows: (1) a “wild type” RBD (RBD219-WT), (2) a deglycosylated form (RBD219-N1) by deleting the first N-glycosylation site, and (3) a combined deglycosylated and cysteine-mutagenized form (C538A-mutated variant (RBD219-N1C1)). We compared the expression yields, biophysical characteristics, and functionality of the proteins produced from these constructs.

*Results and conclusions:* These three recombinant RBDs showed similar secondary and tertiary structure thermal stability and had the same affinity to their receptor, angiotensin-converting enzyme 2 (ACE-2), suggesting that the selected deletion or mutations did not cause any significant structural changes or alteration of function. However, RBD219-N1C1 had a higher fermentation yield, was easier to purify, was not hyperglycosylated, and had a lower tendency to form oligomers, and thus was selected for further vaccine development and evaluation.

*General significance:* By genetic modification, we were able to design a better-controlled and more stable vaccine candidate, which is an essential and important criterion for any process and manufacturing of biologics or drugs for human use.

**KEYWORDS:** coronavirus, *P. pastoris*, biophysical characterization, biotechnology

**ABBREVIATIONS:** COVID-19, Coronavirus disease 2019; SARS, severe acute respiratory syndrome; CoV, coronavirus; S, spike; RBD, receptor-binding domain; DO, dissolved oxygen; FS, fermentation supernatant; CV, column volume; %CV, coefficient of variation; DLS, dynamic light scattering; CD, circular dichroism; ACE-2, angiotensin-converting enzyme 2.

## 69 1. INTRODUCTION

70 Betacoronaviruses have caused major disease outbreaks in humans every decade since the beginning of  
71 the millennium. In 2002, severe acute respiratory syndrome coronavirus (SARS-CoV) was responsible for  
72 8,098 infections and approximately 800 deaths. Beginning in 2012, the Middle East respiratory  
73 syndrome (MERS) caused by MERS-CoV has led to 2,519 infections and 866 associated deaths and the  
74 virus is still circulating in camels. First reported in China in December 2019, SARS-CoV-2, the pathogen  
75 that causes coronavirus disease 2019 (COVID-19), has now rapidly spread worldwide and infected more  
76 than 110 million people and caused approximately 2.5 million deaths up to early March 2021 [1].

77 A coronavirus virion consists of membrane, envelope, nucleocapsid, and spike (S) proteins. Of  
78 these, the S proteins are commonly selected as vaccine candidates due to their critical functions in host  
79 cell entry [2-7]. However, even though no preclinical or human trials have yet reported that  
80 immunopathology could be triggered by the full-length S protein of SARS-CoV-2 after viral challenge [8],  
81 previous preclinical studies in mice indicated that the full-length SARS-CoV S protein could induce  
82 eosinophilic immune enhancement [9, 10] and lung immunopathology [11, 12], possibly due to epitopes  
83 outside of the receptor-binding domain (RBD). The SARS-CoV RBD vaccine was shown to induce high  
84 levels of virus-neutralizing antibodies, minimized or abrogated eosinophilic immune enhancement in  
85 mice compared to the full-length S protein, and can be easily scaled for production [12, 13]; therefore,  
86 some groups consider the RBD an attractive vaccine immunogen alternative to using the full-length S  
87 protein [14-19]. Beyond our findings with SARS-CoV, additional studies have already shown that  
88 mammalian cell-expressed SARS-CoV-2 RBD triggered high specific total IgG as well as neutralizing  
89 antibody titers in mice [7] and that the vaccination of insect cell-expressed RBD protected non-human  
90 primates (NHPs) from SARS-CoV-2 challenge *in vivo* with no significant lung histopathological changes,  
91 further supporting a rationale for using the RBD as antigen to develop an efficacious vaccine [20].

92 Based on previous experience in developing the SARS-CoV RBD vaccine [4, 13, 17] and the high  
93 amino acid sequence similarity between SARS-CoV and SARS-CoV-2 spike proteins [21-23], we selected a  
94 219 amino-acid sequence of SARS-CoV-2 (RBD219-WT), spanning residues 331-549 of the S protein [4].  
95 The sequence includes two glycosylation sites at N331 and N343 [24]. However, hyperglycosylation as  
96 well as dimer formation were observed during the production of RBD219-WT. The variable lengths of  
97 the glycans attached to RBD219-WT posed a challenge to the purification process and no uniform band  
98 was observed by SDS-PAGE. In addition, we observed dimerization of the antigen that might further  
99 impact the quality of antigen. To resolve these issues, we first removed Asn331 from the sequence,  
100 generating RBD219-N1, and then also mutated C538 to alanine (RBD219-N1C1). RBD219-N1C1

101 constitutes a better-controlled and more stable protein, which is an important and essential criterion for  
102 any process and manufacturing of a biologic for human use. The immunogenicity of these vaccine  
103 candidates was recently tested, demonstrating that when formulated with Alhydrogel<sup>®</sup>, these yeast-  
104 expressed RBDs triggered equivalent high titers of neutralizing antibodies [25].

105 Here, we examined the production yield of three tag-free RBDs in the fermentation supernatant  
106 prior to purification. Two of the RBD constructs resulted in high fermentation yields, however, for the  
107 RBD219-N1 construct, we only achieved low fermentation yields with likely high host cell protein levels.  
108 This impeded us from getting any purified RBD219-N1 protein, hence, a hexahistidine tagged construct  
109 (RBD219-N1+His) was created to obtain purified protein for further characterization. Biophysical  
110 characteristics, and *in vitro* functionality of these three purified recombinant RBD proteins were  
111 evaluated. Based on the results, we identified the RBD219-N1C1 construct best suited for advancement.  
112 This construct and its initial process for protein production have been transferred to an industrial  
113 manufacturer, who has successfully produced and scaled it and has now advanced this vaccine  
114 candidate into a Phase I/2 clinical trial [26].

## 115 2. MATERIALS AND METHODS

### 116 2.1. Cloning and expression of SARS-CoV-2 RBDs in yeast *Pichia pastoris*

117 The DNAs encoding RBD219-WT (residues 331–549 of the SARS-CoV-2 spike protein, GenBank:  
118 QHD43416.1), RBD219-N1 (residues 332-549), and RBD219-N1C1 (residues 332-549, C538A) were  
119 codon-optimized based on yeast codon usage preference and synthesized by GenScript (Piscataway, NJ,  
120 USA), followed by subcloning into the *Pichia* secretory expression vector pPICZαA (Invitrogen) using  
121 EcoRI/XbaI restriction sites. A hexahistidine tag version for RBD219-WT and RBD219-N1 (namely,  
122 RBD219-WT+His and RBD219-N1+His, respectively) was also generated by adding additional DNA  
123 encoding six histidine residues at the C-terminus to facilitate purification as a backup. The recombinant  
124 plasmid DNAs were then transformed into *Pichia pastoris* X-33 by electroporation. The expression of the  
125 recombinant RBDs was confirmed by induction with 0.5% methanol at 30 °C for 72 hours. The seed stock  
126 in 20% glycerol of each recombinant construct was then generated as described previously [13].

### 127 2.2. Fermentation and purification of SARS-CoV-2 RBDs

128 RBD219-WT, RBD219-N1, and RBD219-N1C1 in pPICZαA/*P. pastoris* X33 clones were fermented in 5 L  
129 vessels as described previously with minor modifications [13]. Briefly, the seed stock of each construct  
130 was used to inoculate 0.5 L Buffered Minimal Glycerol (BMG) medium until the OD<sub>600</sub> reached 10±5.

131 Depending on the OD<sub>600</sub> of overnight culture, 86-270 mL of the culture was then used to inoculate 2.5 L  
132 sterile low salt medium (LS) in the fermenter containing 3.5 mL/L PTM1 trace elements and 3.5 mL/L  
133 0.02% d-Biotin to reach to initial OD of 0.5. Fermentation was initiated at 30 °C and pH 5.0, while the gas  
134 and agitation were adjusted to maintain dissolved oxygen (DO) at 30%. Upon DO spike, the pH was  
135 ramped up to 6.5 using 14% ammonium hydroxide, and the temperature was lowered to 25°C over  
136 1 hour and methanol was then pumped in from 0.8 mL/L/h to 11 mL/L/h and the pH was adjusted to 6.0  
137 using 14% ammonium hydroxide over 6–8 hours. Induction was maintained at 25 °C with minor  
138 methanol feed adjustments, as needed, for 70 hours. After fermentation, the culture was harvested by  
139 centrifugation. The fermentation supernatant (FS) was then evaluated by SDS-PAGE and Western blot.

140 To purify RBD219-WT, the FS was first filtered through a 0.45 µm filter followed by a negative  
141 capture step with a Q Sepharose XL (QXL) column in 30 mM Tris-HCl, pH 8.0 to remove some host cell  
142 protein. The flow-through from the QXL column was then further purified by a Butyl Sepharose HP  
143 column and a Superdex 75 size exclusion column (SEC). Due to the low target protein yield and large  
144 amounts of impurities present in RBD219-N1 fermentation, we were unable to successfully purify the  
145 tag-free RBD219-N1 by the same approach as RBD219-WT. Instead, we purified the using the  
146 hexahistidine tagged version (RBD219-N1+His, where six additional histidine residues were expressed at  
147 the C-terminus of RBD219-N1); to purify RBD219-N1+His, HisTrap immobilized metal affinity column was  
148 used followed by Superdex 75 chromatography. Finally, to purify RBD219-N1C1, the FS was filtered  
149 through a 0.45 µm filter before a Butyl Sepharose HP column followed by a Superdex 75 column. The  
150 final buffer for these three proteins was TBS (20 mM Tris, 150 mM NaCl, pH 7.5).

### 151 **2.3. SDS-PAGE and Western Blot**

152 RBD219-WT, RBD219-N1+His, and RBD219-N1C1 were loaded on 4-20% Tris-glycine gels, and stained  
153 with Coomassie Blue or transferred to a polyvinylidene difluoride membrane and probed with a  
154 monoclonal anti-SARS-CoV-2 Spike rabbit antibody recognizing the RBD region (Sino Biological, Beijing,  
155 China; Cat # 40150-R007) to evaluate the size and confirm the identity. These three RBDs were also  
156 treated with PNGase-F (New England Biolabs, Ipswich, MA, USA; Cat# P0704S) following the  
157 manufacturer's instruction and loaded onto SDS-PAGE gels to evaluate the impact of size caused by  
158 glycosylation. Western blotting was also used to evaluate the fermentation yield; in short, serially  
159 diluted purified RBD protein corresponding to the construct in the fermentation run was loaded on the  
160 Tris-glycine gels with a fixed volume of undiluted fermentation supernatant of different RBD constructs.

161 A log-log plot of RBD intensity versus the known amount of loaded RBD was graphed and the linear  
162 regression was calculated from the plot.

#### 163 **2.4. Size and Protein Aggregation Assessment by Dynamic Light Scattering**

164 Purified RBDs were adjusted to 1 mg/mL in TBS in three to four replicates to evaluate the hydrodynamic  
165 radius and molecular weight using a DynaPro Plate Reader II (Wyatt Technology) based on a globular  
166 protein model. The sizes of these RBDs at room temperature were monitored for approximately 30 days.  
167 Additionally, to evaluate the tendency of protein oligomerization among different RBDs, these purified  
168 proteins were concentrated to approximately 7.5 mg/mL and serially diluted to approximately 0.66  
169 mg/mL to calculate the diffusion interaction parameter ( $k_D$ ) for each RBD using the following equation  
170 [13, 27]:

$$171 D = D_0(1 + k_D \times c)$$

172 where  $D$  is the measured diffusion coefficient,  $D_0$  is the coefficient of the RBDs at an infinite dilution, and  
173  $k_D$  is the diffusion interaction parameter.

#### 174 **2.5. Hydrophobicity Assessment by Extrinsic Fluorescence**

175 Purified RBDs and two controls (BSA and lysozyme) at concentrations of 7.8 ng/mL - 1.0 mg/mL in TBS  
176 were probed with 12.5 nM Nile Red (Sigma-Aldrich, St. Louis, MO, USA; Cat # 3013) to generate extrinsic  
177 fluorescence for surface hydrophobicity measurement, as described previously [13, 28]. The emission  
178 spectra were recorded from 550 to 700 nm with the gain set at 130 after excitation at 520 nm using a  
179 BioTek Synergy H4 plate reader. The surface hydrophobicity of RBD219-WT, RBD219-N1+His, RBD219-  
180 N1C1, BSA, and lysozyme was determined using the slope of the emission peak intensity versus protein  
181 concentration plot, as described previously [13, 29].

#### 182 **2.6. Structural Assessment by Circular Dichroism (CD)**

183 Purified RBDs were diluted with deionized water to a final concentration of 0.2 mg/mL and loaded in a  
184 0.1 cm path cuvette. Please note that dilution with water was to reduce the chloride ion content which  
185 is known to interfere with the CD absorbance. CD spectra were obtained from 250 to 190 nm with a  
186 Jasco J-1500 spectrophotometer set at 100 nm/min and a response time of 1 s at 25°C. The obtained CD  
187 data were analyzed using a CD Analysis and Plotting Tool (<https://capito.uni-jena.de/index.php>). In  
188 addition, the RBDs (0.5 mg/mL) were heated from 25 °C to 95 °C for a denaturation profile analysis.

189           **2.7. Structural Assessment by Thermal shift**

190    To evaluate the thermal stability of the tertiary structures for these three RBDs, a 1 mg/mL solution of  
191    these proteins was mixed with the Protein Thermal Shift™ Dye kit (Thermo Fisher, Waltham, MA, USA;  
192    Cat # 4461146) in triplicate as per the manufacturer's instructions. Briefly, 5 µL of Protein Thermal Shift  
193    buffer was mixed with 12.5 µL of 1.0 mg/mL RBD and 2.5 µL of 8x Protein Thermal Shift dye in each PCR  
194    tube in three to four replicates. These PCR tubes were vortexed briefly and centrifuged at 1000x g for 1  
195    minute to remove any bubbles. The samples were further heated from 25 °C to 95 °C to monitor the  
196    fluorescence intensity change using a ViiA™ 7 Real-Time PCR system.

197           **2.8. *in vitro* Functionality Assay by ELISA (ACE-2 binding)**

198    Ninety-six-well ELISA plates were coated with 100 µL 2 µg/mL RBD219-WT, RBD219-N1+His, RBD219-  
199    N1C1, or BSA overnight in triplicate at 4°C followed by blocking with PBST/0.1% BSA. Once the plates  
200    were blocked, 100 µL serially diluted ACE-2-hFc (LakePharma, San Carlos, CA, USA; Cat # 46672) with an  
201    initial concentration of 50 µg/mL was added to the wells. The plates were incubated at room  
202    temperature for 2 hours to allow ACE-2 to interact with each RBD. After this binding step, the plates  
203    were washed with PBST four times followed by adding 100 µL 1:10,000 diluted HRP conjugated anti-  
204    human IgG antibodies (GenScript, Piscataway, NJ, USA; Cat # A00166) and incubating for 1 hour at room  
205    temperature. Finally, 100 µL TMB substrate was added and incubated for 4 minutes in the dark to react  
206    with HRP. The reaction was terminated with 100 µL HCl and absorption readings were taken at 450 nm  
207    using a BioTek EPOCH 2 microplate reader. The results were analyzed using one-way ANOVA to evaluate  
208    the statistical difference among the ELISA data generated for these three RBDs.

209

210           **3. RESULTS**

211           **3.1. Cloning, expression yield, and protein integrity**

212    The SARS-CoV-2 RBD vaccine antigen was originally designed and expressed using the same approach as  
213    reported previously for the 70% homologous SARS-CoV RBD equivalent [13]. Three recombinant  
214    constructs, RBD219-WT, RBD219-N1, and RBD219-N1C1 (Figure 1), were transformed into *P. pastoris* and  
215    expressed at the 5 L fermentation scale.

216           The harvested fermentation supernatants (FS) of RBD219-WT, RBD219-N1, and RBD219-N1C1  
217    were first analyzed by SDS-PAGE (Figure 2A) and their fermentation yields were quantified using  
218    western blot (Supplementary Figure S1 and Table 1). When observing the FS profile for RBD219-WT on

219 SDS-PAGE gel (Figure 2A) and western blot membrane (Supplementary Figures S1A and S1C), large  
220 amounts of protein bands were not recognized by the anti-SARS-CoV-2 Spike rabbit antibody, possibly  
221 indicating the presence of host cell proteins (HCP), as well as yeast-derived hyperglycosylation. The  
222 fermentation yield of RBD219-WT was estimated as  $142 \pm 8$  mg/L of fermentation supernatant (Table 1).

223 To address the yeast-derived hyperglycosylation, we cloned and expressed RBD219-N1, in which  
224 the N-terminal asparagine residue was removed. However, the fermentation yield of RBD219-N1 was  
225 low ( $50 \pm 13$  mg/L of FS, Table 1), and the level of non-RBD proteins, likely HCP impurities, remained a  
226 concern (Figure 2A and Supplementary Figures S1E and S1F). Due to the low yield and high level of non-  
227 target-specific proteins, we were unable to purify tag-free RBD219-N1; thus, the hexahistidine tagged  
228 construct (RBD219-N1+His) was used to obtain purified protein for later characterization. We also  
229 observed that both RBD219-WT and RBD219-N1 formed dimers during fermentation. This suggested the  
230 potential formation of an intermolecular disulfide bond between a potential free cysteine found in the  
231 molecule, and therefore, a C538A-mutated form of RBD219-N1, RBD219-N1C1, was constructed. The  
232 rationale is that there are nine cysteine residues in the RBD, where we assumed that eight residues  
233 formed intramolecular bonds, leaving the last cysteine available for undesired intermolecular cross-  
234 linking. The new C538A-mutated construct based on the RBD219-N1 backbone was able to express the  
235 protein (RBD219-N1C1) with low yeast-derived hyperglycosylation, without the presence of extensive  
236 non-RBD specific proteins or HCPs (Figure 2A), and with a fermentation yield of  $280 \pm 70$  mg/L of FS  
237 (Table 1). Even though, when fermentation yields were analyzed using western blot, one could observe a  
238 dimer form of RBD219-N1C1 in the fermentation supernatant (Supplementary Figures S1I and S1K), such  
239 dimer was not seen after purification in the final purified protein (Figure 2B). After treating the three  
240 purified RBDs with PNGase-F to remove N-glycans, RBDs with similar size were observed (Figure 2C;  
241 Please note that the band at 37 kDa was PNGase-F enzyme), which confirmed that the size differences  
242 were likely due to the yeast-derived glycosylation.

### 243 **3.2. Size evaluation and protein-interaction assessment by DLS**

244 Dynamic light scattering (DLS) was used to evaluate the size of the purified RBDs in solution. The results  
245 indicated that SARS-CoV-2 RBD219-WT has a slightly larger hydrodynamic radius ( $2.79 \pm 0.01$  nm) than  
246 RBD219-N1C1 ( $2.56 \pm 0.00$  nm), and thus a higher calculated molecular weight ( $37.5 \pm 0.5$  kDa) than  
247 RBD219-N1C1 ( $30 \pm 0.0$  kDa) (Figure 3A), presumably due to the additional N-glycans. Interestingly, even  
248 though RBD219-N1+His was less glycosylated due to the removal of the first glycosylation site, its  
249 hydrodynamic radius ( $2.74 \pm 0.01$  nm,  $35.7 \pm 0.5$  kDa) was similar to RBD219-WT; thus, it was suspected



250 that potential oligomer formation might have occurred. We further determined the diffusion interaction  
251 parameter ( $K_D$ ) of three RBDs (Figure 3B and Table 2) to evaluate the level of protein-protein interaction.  
252 The results indicated that all three RBDs in TBS showed negative  $K_D$  values, implying protein attractions.  
253 However, it was noticed that the  $K_D$  of RBD219-N1C1 (-16.3 mL/g) was similar to that of RBD219-WT (-  
254 14.9 mL/g), while that of RBD219-N1+His was almost double (-29.7 mL/g), suggesting that RBD219-  
255 N1+His was even more prone to form oligomers. Additionally, when we monitored the changes of the  
256 molecular weight for RBDs stored at room temperature, it was observed that both the molecular weight  
257 of RBD219-WT and RBD219-N1+His increased over time while the size of RBD219-N1C1 remained  
258 unchanged at ~30kDa (Figure 3C).

### 259 3.3. Hydrophobicity Assessment Using Extrinsic Fluorescence

260 In this study, we used Nile red dye to probe these three purified RBDs to further evaluate their surface  
261 hydrophobicity in TBS (Figures 4A and 4B). In general, a blue shift in emission peak wavelength  $\lambda_{max}$ , or  
262 a lower  $\lambda_{max}$  value, indicates an increase in hydrophobicity due to more binding of Nile red to the  
263 protein. The emission peaks  $\lambda_{max}$  of RBD219-WT, RBD219-N1+His, and RBD219-N1C1 in TBS were  
264 determined as 658, 642 and 658 nm, respectively, indicating that RBD219-N1+His was more hydrophobic  
265 than the other two RBD molecules, and these three RBDs were less hydrophobic than BSA ( $\lambda_{max} = 634$   
266 nm) and more hydrophobic than lysozyme ( $\lambda_{max} = 662$  nm) (Figure 4A and Table 2). Additionally, the  
267 surface hydrophobicity ( $S_0$ ) calculated by the plot of fluorescence intensity vs concentration (Figure 4B  
268 and Table 2) indicated that RBD219-WT and RBD219-N1C1 shared similar surface hydrophobicity ( $S_0$ ;  
269  $S_{0, RBD219-WT} = 3.14$  RFU\*L/mg and  $S_{0, RBD219-N1C1} = 2.78$  RFU\*L/mg, respectively), while RBD219-N1+His showed  
270 higher surface hydrophobicity ( $S_{0, RBD219-N1+His} = 9.82$  RFU\*L/mg). Overall, the results indicated  $S_{0, BSA} > S_{0,}$   
271  $S_{0, RBD219-N1+His} > S_{0, RBD219-WT} \sim S_{0, RBD219-N1C1} > S_{0, Lysozyme}$ ) which were consistent with the observation based on  
272 the wavelength of the extrinsic fluorescence emission peak.

### 273 3.4. Secondary structure thermal stability assessment

274 When far-UV CD spectrometry was performed to investigate the secondary structure of the three  
275 purified RBDs, we observed a very similar secondary structure with 8% alpha-helix and 33% beta-sheet  
276 (Fig. 5A). The thermal stability of the secondary structures was evaluated by heating the samples from  
277 25 °C to 95 °C (Figs. 5B-5D) and CD melting curves and their derivatives were further examined at 231  
278 nm (Figures. 5E-G). Based on the derivative, the average melting temperatures ( $T_m$ ) were 52.3 °C, 53.3 °C,

279 and 51.9 °C for RBD219-WT, RBD219-N1+His, and RBD219-N1C1 respectively with only 1.1% of the  
280 variation of coefficient (%CV) among these melting temperatures, suggesting similar thermal stability.

### 281 **3.5. Tertiary structure thermal stability assessment**

282 Thermal shift assays were used for evaluating the thermal stability of the tertiary structure for the three  
283 purified RBD proteins. The melting curve (Figure 6A) indicated that the onset temperature ( $T_{on}$ ) for these  
284 RBDs was approximately 38 °C, and the higher initial fluorescence of RBD219-N1+His observed in Figure  
285 6A implied that more thermal shift dye bound to the molecule, which suggested higher hydrophobicity  
286 of this molecule than for the other two RBDs. This finding is consistent with the observation in the  
287 extrinsic fluorescence study. The derivatives indicated the melting temperatures ( $T_m$ ) for RBD219-WT,  
288 RBD219-N1+His, and RBD219-N1C1 as  $50.6 \pm 0.5$  °C,  $49.2 \pm 0.5$  °C and  $50.8 \pm 0.4$  °C, respectively (Figure  
289 6B) with a %CV value of 1.4%. The similar thermal shift profile and thermal stability observed in the  
290 thermal shift assays further suggested that the three RBDs likely shared similar tertiary structures.

### 291 **3.6. *in vitro* Functionality comparison of the RBD proteins in an ACE-2 binding study.**

292 To examine the *in vitro* functionality of the purified RBDs, we evaluated their ability to bind to a  
293 recombinant ACE-2 protein reflecting the human receptor, ACE-2 (Figure 7). No significant binding was  
294 found between ACE-2 and BSA, indicating that RBD binding to ACE-2 in this assay was specific. No  
295 statistical difference ( $p=0.935$ ) among the binding of ACE-2 to RBD219-WT, RBD219-N1+His, or RBD219-  
296 N1C1 proteins was seen, indicating that hyperglycosylation on RBD219-WT, the N1 deletion, or the  
297 cysteine mutation on RBD219-N1C1 did not impact the *in vitro* ability of these proteins to bind to the  
298 ACE-2 receptor.

299

300

## 301 **4. DISCUSSION**

302 As COVID-19 spreads worldwide, it has now become predominant among populations living in poverty,  
303 especially in crowded urban areas and mega-cities located in low- and middle-income countries (LMICs)  
304 [30]; take India and Brazil as examples, the majority of the cases, over 2.1 million and 1.9 million, are  
305 reported in Maharashtra state, where Mumbai city is located, and State of Sao Paulo, where Sao Paulo  
306 city is located, respectively [1]. In the race to develop a vaccine against COVID-19, many candidates have  
307 moved forward to clinical trials. Based on several COVID-19 clinical trials databases and the World  
308 Health Organization (WHO) tracker, there are 63 vaccines currently in Phase 1 to 3 clinical trials [31, 32].

309 Among them, 17 are recombinant subunit vaccines, mainly using either recombinant spike or RBD  
310 proteins as a vaccine antigen [31, 33]. Within these recombinant subunit vaccine candidates, two  
311 vaccines, spike trimer from Novavax [34-36] and RBD dimer from Anhui Zhifei Longcom Biopharmaceutical  
312 [37, 38], are currently in Phase 3 and fifteen vaccines are in Phase 1/2, including the RBD219-N1C1  
313 candidate presented in this manuscript [26, 32]. However, it is noted that many of these recombinant  
314 protein-based vaccine candidates are expressed using mammalian cell or insect cell systems [20, 34, 37,  
315 39, 40] that are not always considered the most cost-effective and globally accessible.

316 To develop a safe and effective vaccine that is also affordable and easily accessible, we have  
317 focused our vaccine development efforts using a yeast-based expression system, similar to the low-cost  
318 recombinant hepatitis B vaccine expressed in yeast that is produced in several LMICs, including Brazil,  
319 Cuba, India, Indonesia, and elsewhere [26]. In this study, we, therefore, evaluated three different yeast-  
320 expressed antigen constructs, RBD219-WT, RBD219-N1, and RBD219-N1C1 by comparing their  
321 fermentation yield, biophysical characteristics, and *in vitro* functionality.

322 During the initial expression of RBD219-WT, it was found that the protein was hyperglycosylated,  
323 which could pose challenges during the production process and impact yields, reproducibility, and  
324 stability. Based on the lessons learned from the development of the yeast-expressed SARS-CoV RBD [4],  
325 we removed the N-331 residue, generating RBD219-N1. This increased the uniformity of the RBD size by  
326 SDS-PAGE (Supplementary Figure S1). However, we discovered that dimer formation via intermolecular  
327 disulfide bridging occurred during expression of the RBD219-N1 protein. While Dai et al. have recently  
328 shown that an RBD dimer improved immunogenicity of their vaccine candidate [41], we note that dimer  
329 formation is typically considered a challenge while establishing production reproducibility, scalability,  
330 stability and quality characteristics in support of regulatory enabling documentation. When investigating  
331 the structure of RBD219-N1 using PDB ID 6XEY [42], we saw nine cysteine residues, eight of which  
332 formed disulfide bonds (Supplementary Figure S2) while one, C538, was free to form intermolecular  
333 disulfide bonds. In RBD219-N1C1, we therefore mutated the free C538 residue to alanine to avoid this  
334 issue. That residue has not been shown to be an epitope involved in triggering neutralizing antibodies.

335 Densitometry of Coomassie blue-stained SDS-PAGE gels is generally used to evaluate the protein  
336 yield during the fermentation runs [13, 43, 44]; however, in this case, due to the high levels of likely HCP  
337 impurities observed in the FS for both RBD219-WT and RBD219-N1, the method could not be applied,  
338 and hence, we had to use western blots to assess the yields of the unpurified proteins after  
339 fermentation. By using this immunoblot-based method, we were able to quantify the protein production

340 in the fermentation supernatants without the interference of HCPs. The protein yield quantified using  
341 western blot indicated that in the FS, RBD219-N1C1 had the highest yield among the three constructs.  
342 Due to the high HCP background found in RBD219-WT FS, QXL was used to first capture most of the  
343 HCPs leaving the target protein in the flow-through, this flow-through was further purified using Butyl  
344 HP followed by SEC. As for the RBD219-N1 construct, the target protein was barely visible in the FS when  
345 analyzed by SDS-PAGE, and thus, we were unable to purify tag-free RBD219-N1 protein; instead, a  
346 hexahistidine-tagged protein was expressed and purified by metal affinity column. RBD219-N1C1,  
347 however, was the dominant protein found in the FS and could be easily purified by a simple two-step  
348 purification scheme similar to the yeast expressed SARS-CoV RBD219-N1 [13]. Therefore, RBD219-N1C1  
349 was selected for further process development and scale-up.

350 While further evaluating the purified RBDs by SDS-PAGE and western blot, dimers were  
351 observed in purified RBD219-WT and RBD219-N1+His only under the non-reduced condition, suggesting  
352 potential intermolecular disulfide bond formation. Mutating the free cysteine residue successfully  
353 reduced the propensity of oligomerization during fermentation, as no dimer formation was found in  
354 purified RBD219-N1C1. Additionally, as part of the stability evaluation, when monitoring the size using  
355 DLS, purified RBD219-N1C1 remained at 30 kDa for approximately 30 days while RBD219-WT and  
356 RBD219-N1+His continued to form oligomers. However, when determining the diffusion interaction  
357 parameter ( $K_D$ ) using DLS and assessing surface hydrophobicity ( $S_0$ ) using extrinsic fluorescence, we  
358 observed that RBD219-WT and RBD219-N1C1 shared similar  $K_D$  and  $S_0$  values while RBD219-N1+His  
359 showed a lower  $K_D$  and higher  $S_0$  values, implying a higher tendency to form oligomers. The high  
360 oligomerization tendency for RBD219-N1+His is likely due to the additional hexahistidine as we also  
361 performed an extrinsic fluorescence study on a hexahistidine-tagged version of RBD219-WT (RBD219-  
362 WT+His), and the results indicated a much higher surface hydrophobicity value (12.7 RFU\*L/mg;  
363 supplementary Figure S3) than RBD219-WT. The pKa of the imidazole ring in histidine is approximately  
364 6.0, suggesting that at pH 7.5, this aromatic ring is likely non-protonated, which makes this additional  
365 hexahistidine more hydrophobic.

366 When assessing the secondary and tertiary structures, far-UV circular dichroism spectra  
367 revealed that RBD219-WT, RBD219-N1+His, and RBD219-N1C1 purified proteins had similar secondary  
368 structures. The melting temperatures evaluated by CD and thermal shift assays also indicated that these  
369 three RBDs shared similar thermal stability for both secondary and tertiary structures. Additionally, Li *et*  
370 *al.* have derived neutralizing monoclonal antibodies from COVID-19 patients, and the most potent

371 neutralizing antibodies that recognized the RBD blocked ACE-2 binding [42]. Thus, confirming the ACE-2  
372 binding is crucial to ensure the epitopes within the ACE-2 binding site are still intact. A similar binding  
373 affinity to ACE-2 among all three RBDs was observed, suggesting that removing the first amino acid  
374 and/or mutating the free cysteine to alanine did not impact protein structure or functionality.

375         While the yeast-expressed RBD can be a potent vaccine candidate, we also recognize potential  
376 limitations and concerns: (1) N-glycosylation: Even though the ACE-2 binding site contains potent  
377 neutralizing epitopes, several recent studies indicated that some neutralizing antibodies recognize  
378 epitopes outside of the binding site, such near N343 [45, 46]. Yeast-derived glycans typically contain  
379 high levels of mannose [47], while mammalian cell-derived glycans are more complex. In the case of  
380 mammalian-cell culture expressed SARS-CoV-2, the N343 residue is highly fucosylated [48], and thus,  
381 antibodies raised against the yeast-derived protein might have a different quality. Notably, yeast-  
382 derived mannosylation has been shown to induce mannose receptor-mediated macrophage recruitment  
383 that might actually enhance immunogenicity [49, 50]. In a preclinical study conducted in mice, the yeast-  
384 expressed RBD was indeed able to induce high levels of antigen-specific antibodies and neutralizing  
385 antibodies [25].

386         (2) Design: The C538A mutation was designed to prevent dimer formation via intermolecular  
387 disulfide bond bridging and to improve stability. Since this mutation did not occur naturally, it could  
388 potentially affect immunogenicity, efficacy and safety of the vaccine antigen. However, the preclinical  
389 data indicated that RBD219-WT and RBD219-N1C1 were able to induce similar levels of neutralizing  
390 antibodies [25]. Since it is unknown whether the C538A mutation may have a safety effect, it is  
391 important this is monitored in the clinical settings. Nevertheless, as C539 is not conformationally close  
392 to the RBM (Supplementary Figure S2), and this cysteine was naturally forming a disulfide bridge with  
393 C590 (PDB ID: 6XEY) [42], the area near this residue is less likely to trigger neutralizing antibodies.  
394 Ongoing studies are evaluating a shortened RBD sequence that excludes C539 at the C terminus to  
395 preserve the native sequence.

396         (3) Antigen length: Studies have demonstrated that the neutralizing epitopes of the SARS-CoV-2  
397 S protein are located in the N-terminal domain and the RBD of S1, and potentially on S2 [42, 51]. During  
398 the transmission among hosts, viral mutations can occur. Knowing that the RBD is only part of the spike  
399 protein, it may be more vulnerable to viral escape mutations, especially when the mutations are  
400 observed in the RBM region. Based on the lessons learned from SARS, it was discovered that some of  
401 the neutralizing antibodies recognizing the RBD of SARS-CoV strains from the first outbreak (Urbani,

402 Tor2) did not possess potent neutralization ability against strains isolated from the second outbreak  
403 (GD03) [52]. The recently emerging SARS-CoV-2 South Africa variant (B.1.351) contains a concerning  
404 mutation, E484K, located in the RBM, which reduced the neutralizing ability of monoclonal antibodies  
405 and human convalescent sera raised against earlier SARS-CoV-2 variants [53, 54] and also negatively  
406 impacted the efficacy of several full-length S-protein vaccines [55]. Studies are underway to elucidate  
407 this question for RBD219-N1C1, and may also include the expansion of the antigen sequence beyond the  
408 RBD.

409

## 410 **5. Conclusions**

411 In this study, we have modified genetically and generated three different SARS-CoV-2 RBD  
412 constructs. The RBD219-N1C1 construct provided higher protein yields in the FS (~280 mg RBD219-  
413 N1C1/L of FS), and the fermentation process was less impacted based on the detection of fewer  
414 impurities. This facilitated the use of a straightforward and relatively efficient initial purification scheme,  
415 with an approximate recovery yield of ~189 mg of purified RBD219-N1C1/L of FS. With respect to  
416 biophysical characteristics, unlike RBD219-WT and RBD219-N1 proteins, the purified RBD219-N1C1  
417 protein does not appear to form dimers via intermolecular disulfide bridging. Additionally, RBD219-WT,  
418 RBD219-N1+His, and RBD219-N1C1 showed similar thermal stability and the same binding affinity to  
419 their receptor, ACE-2, further suggesting that the deletion of the first amino acid and mutation of the  
420 free cysteine did not cause any significant structural changes. Based on all the data, we conclude that  
421 the RBD219-N1C1 construct is the superior candidate to move forward. For this vaccine candidate to  
422 advance to clinical development, we have extensively studied and developed a robust, scalable, and  
423 reproducible production process. This construct and its initial process for protein production have been  
424 transferred to an industrial manufacturer, who has successfully produced and scaled it and has now  
425 advanced this vaccine candidate into a Phase I/2 clinical trial [26].

## 426 **Author contributions**

427 WHC conceived the study, designed and performed experiments, interpreted data, and wrote the  
428 manuscript; JW performed experiments and interpreted data; RTK, RA, ZL, JL, LV, CP, BK, MJV, ACAL, and  
429 JAR performed experiments; JP participated in interpreting data, reviewed/edited the manuscript; PMG  
430 reviewed/edited the manuscript and effected logistic and supervision; US reviewed/edited the

431 manuscript; BZ reviewed/edited the manuscript; PJH reviewed/edited the manuscript; MEB  
432 reviewed/edited the manuscript US, BZ, PJH, and MEB also provided scientific guidance on the project.

#### 433 **Conflict of interest**

434 The authors declare that Baylor College of Medicine recently licensed the RBD219-N1C1 technology to  
435 an Indian manufacturer for further development. The research conducted in this paper was performed  
436 in the absence of any commercial or financial relationships that could be construed as a potential  
437 conflict of interest.

#### 438 **Acknowledgments**

439 This work was supported by the Robert J. Kleberg Jr. and Helen C. Kleberg Foundation; Fifth Generation,  
440 Inc. (Tito's Handmade Vodka); JPB Foundation, NIH-NIAID (AI14087201); and Texas Children's Hospital  
441 Center for Vaccine Development Intramural Funds. We also would like to thank PATH Center for Vaccine  
442 Innovation and Access (Seattle, WA, USA) for their guidance as well as technical and intellectual support.

443

#### 444 **References**

- 445 [1] E. Dong, H. Du, L. Gardner, An interactive web-based dashboard to track COVID-19 in real time,  
446 *Lancet Infect Dis*, 20 (2020) 533-534.
- 447 [2] S. Jiang, M.E. Bottazzi, L. Du, S. Lustigman, C.T. Tseng, E. Curti, K. Jones, B. Zhan, P.J. Hotez, Roadmap  
448 to developing a recombinant coronavirus S protein receptor-binding domain vaccine for severe acute  
449 respiratory syndrome, *Expert Rev Vaccines*, 11 (2012) 1405-1413.
- 450 [3] L. Du, G. Zhao, Y. He, Y. Guo, B.J. Zheng, S. Jiang, Y. Zhou, Receptor-binding domain of SARS-CoV spike  
451 protein induces long-term protective immunity in an animal model, *Vaccine*, 25 (2007) 2832-2838.
- 452 [4] W.H. Chen, L. Du, S.M. Chag, C. Ma, N. Tricoche, X. Tao, C.A. Seid, E.M. Hudspeth, S. Lustigman, C.T.  
453 Tseng, M.E. Bottazzi, P.J. Hotez, B. Zhan, S. Jiang, Yeast-expressed recombinant protein of the receptor-  
454 binding domain in SARS-CoV spike protein with deglycosylated forms as a SARS vaccine candidate, *Hum*  
455 *Vaccin Immunother*, 10 (2014) 648-658.
- 456 [5] W.H. Chen, U. Strych, P.J. Hotez, M.E. Bottazzi, The SARS-CoV-2 Vaccine Pipeline: an Overview, *Curr*  
457 *Trop Med Rep*, (2020) 1-4.
- 458 [6] M.P. Nyon, L. Du, C.K. Tseng, C.A. Seid, J. Pollet, K.S. Naceanceno, A. Agrawal, A. Algaissi, B.H. Peng,  
459 W. Tai, S. Jiang, M.E. Bottazzi, U. Strych, P.J. Hotez, Engineering a stable CHO cell line for the expression  
460 of a MERS-coronavirus vaccine antigen, *Vaccine*, 36 (2018) 1853-1862.
- 461 [7] W. Tai, L. He, X. Zhang, J. Pu, D. Voronin, S. Jiang, Y. Zhou, L. Du, Characterization of the receptor-  
462 binding domain (RBD) of 2019 novel coronavirus: implication for development of RBD protein as a viral  
463 attachment inhibitor and vaccine, *Cell Mol Immunol*, (2020).
- 464 [8] B.F. Haynes, L. Corey, P. Fernandes, P.B. Gilbert, P.J. Hotez, S. Rao, M.R. Santos, H. Schuitemaker, M.  
465 Watson, A. Arvin, Prospects for a safe COVID-19 vaccine, *Sci Transl Med*, 12 (2020).

- 466 [9] M. Jaume, M.S. Yip, Y.W. Kam, C.Y. Cheung, F. Kien, A. Roberts, P.H. Li, I. Dutry, N. Escriou, M. Daeron,  
467 R. Bruzzone, K. Subbarao, J.S. Peiris, B. Nal, R. Altmeyer, SARS CoV subunit vaccine: antibody-mediated  
468 neutralisation and enhancement, *Hong Kong Med J*, 18 Suppl 2 (2012) 31-36.
- 469 [10] Q. Wang, L. Zhang, K. Kuwahara, L. Li, Z. Liu, T. Li, H. Zhu, J. Liu, Y. Xu, J. Xie, H. Morioka, N.  
470 Sakaguchi, C. Qin, G. Liu, Immunodominant SARS Coronavirus Epitopes in Humans Elicited both  
471 Enhancing and Neutralizing Effects on Infection in Non-human Primates, *ACS Infect Dis*, 2 (2016) 361-  
472 376.
- 473 [11] C.T. Tseng, E. Sbrana, N. Iwata-Yoshikawa, P.C. Newman, T. Garron, R.L. Atmar, C.J. Peters, R.B.  
474 Couch, Immunization with SARS coronavirus vaccines leads to pulmonary immunopathology on  
475 challenge with the SARS virus, *PLoS One*, 7 (2012) e35421.
- 476 [12] W.H. Chen, X. Tao, A.S. Agrawal, A. Algaissi, B.H. Peng, J. Pollet, U. Strych, M.E. Bottazzi, P.J. Hotez, S.  
477 Lustigman, L. Du, S. Jiang, C.K. Tseng, Yeast-expressed SARS-CoV recombinant receptor-binding domain  
478 (RBD219-N1) formulated with aluminum hydroxide induces protective immunity and reduces immune  
479 enhancement, *Vaccine*, 38 (2020) 7533-7541.
- 480 [13] W.H. Chen, S.M. Chag, M.V. Poongavanam, A.B. Biter, E.A. Ewere, W. Rezende, C.A. Seid, E.M.  
481 Hudspeth, J. Pollet, C.P. McAtee, U. Strych, M.E. Bottazzi, P.J. Hotez, Optimization of the Production  
482 Process and Characterization of the Yeast-Expressed SARS-CoV Recombinant Receptor-Binding Domain  
483 (RBD219-N1), a SARS Vaccine Candidate, *J Pharm Sci*, 106 (2017) 1961-1970.
- 484 [14] S.K. Wong, W. Li, M.J. Moore, H. Choe, M. Farzan, A 193-amino acid fragment of the SARS  
485 coronavirus S protein efficiently binds angiotensin-converting enzyme 2, *J Biol Chem*, 279 (2004) 3197-  
486 3201.
- 487 [15] S. Jiang, M.E. Bottazzi, L. Du, S. Lustigman, C.-T.K. Tseng, E. Curti, K. Jones, B. Zhan, P.J. Hotez,  
488 Roadmap to developing a recombinant coronavirus S protein receptor-binding domain vaccine for  
489 severe acute respiratory syndrome, *Expert Review of Vaccines*, 11 (2012) 1405-1413.
- 490 [16] L. Du, G. Zhao, C.C. Chan, S. Sun, M. Chen, Z. Liu, H. Guo, Y. He, Y. Zhou, B.J. Zheng, S. Jiang,  
491 Recombinant receptor-binding domain of SARS-CoV spike protein expressed in mammalian, insect and E.  
492 coli cells elicits potent neutralizing antibody and protective immunity, *Virology*, 393 (2009) 144-150.
- 493 [17] L. Du, G. Zhao, C.C. Chan, L. Li, Y. He, Y. Zhou, B.J. Zheng, S. Jiang, A 219-mer CHO-expressing  
494 receptor-binding domain of SARS-CoV S protein induces potent immune responses and protective  
495 immunity, *Viral Immunol*, 23 (2010) 211-219.
- 496 [18] L. Du, G. Zhao, L. Li, Y. He, Y. Zhou, B.J. Zheng, S. Jiang, Antigenicity and immunogenicity of SARS-  
497 CoV S protein receptor-binding domain stably expressed in CHO cells, *Biochem Biophys Res Commun*,  
498 384 (2009) 486-490.
- 499 [19] L. Du, G. Zhao, Y. He, Y. Guo, B.J. Zheng, S. Jiang, Y. Zhou, Receptor-binding domain of SARS-CoV  
500 spike protein induces long-term protective immunity in an animal model, *Vaccine*, 25 (2007).
- 501 [20] J. Yang, W. Wang, Z. Chen, S. Lu, F. Yang, Z. Bi, L. Bao, F. Mo, X. Li, Y. Huang, W. Hong, Y. Yang, Y.  
502 Zhao, F. Ye, S. Lin, W. Deng, H. Chen, H. Lei, Z. Zhang, M. Luo, H. Gao, Y. Zheng, Y. Gong, X. Jiang, Y. Xu, Q.  
503 Lv, D. Li, M. Wang, F. Li, S. Wang, G. Wang, P. Yu, Y. Qu, L. Yang, H. Deng, A. Tong, J. Li, Z. Wang, J. Yang,  
504 G. Shen, Z. Zhao, Y. Li, J. Luo, H. Liu, W. Yu, M. Yang, J. Xu, J. Wang, H. Li, H. Wang, D. Kuang, P. Lin, Z. Hu,  
505 W. Guo, W. Cheng, Y. He, X. Song, C. Chen, Z. Xue, S. Yao, L. Chen, X. Ma, S. Chen, M. Gou, W. Huang, Y.  
506 Wang, C. Fan, Z. Tian, M. Shi, F.S. Wang, L. Dai, M. Wu, G. Li, G. Wang, Y. Peng, Z. Qian, C. Huang, J.Y. Lau,  
507 Z. Yang, Y. Wei, X. Cen, X. Peng, C. Qin, K. Zhang, G. Lu, X. Wei, A vaccine targeting the RBD of the S  
508 protein of SARS-CoV-2 induces protective immunity, *Nature*, (2020).
- 509 [21] W.H. Chen, P.J. Hotez, M.E. Bottazzi, Potential for developing a SARS-CoV receptor-binding domain  
510 (RBD) recombinant protein as a heterologous human vaccine against coronavirus infectious disease  
511 (COVID)-19, *Hum Vaccin Immunother*, 16 (2020) 1239-1242.
- 512 [22] P. Zhou, X.L. Yang, X.G. Wang, B. Hu, L. Zhang, W. Zhang, H.R. Si, Y. Zhu, B. Li, C.L. Huang, H.D. Chen,  
513 J. Chen, Y. Luo, H. Guo, R.D. Jiang, M.Q. Liu, Y. Chen, X.R. Shen, X. Wang, X.S. Zheng, K. Zhao, Q.J. Chen, F.



- 514 Deng, L.L. Liu, B. Yan, F.X. Zhan, Y.Y. Wang, G.F. Xiao, Z.L. Shi, A pneumonia outbreak associated with a  
515 new coronavirus of probable bat origin, *Nature*, 579 (2020) 270-273.
- 516 [23] M. Hoffmann, H. Kleine-Weber, S. Schroeder, N. Kruger, T. Herrler, S. Erichsen, T.S. Schiergens, G.  
517 Herrler, N.H. Wu, A. Nitsche, M.A. Muller, C. Drosten, S. Pohlmann, SARS-CoV-2 Cell Entry Depends on  
518 ACE2 and TMPRSS2 and Is Blocked by a Clinically Proven Protease Inhibitor, *Cell*, 181 (2020) 271-280  
519 e278.
- 520 [24] D. Wrapp, N. Wang, K.S. Corbett, J.A. Goldsmith, C.L. Hsieh, O. Abiona, B.S. Graham, J.S. McLellan,  
521 Cryo-EM structure of the 2019-nCoV spike in the prefusion conformation, *Science*, 367 (2020) 1260-  
522 1263.
- 523 [25] J. Pollet, W.-H. Chen, L. Versteeg, B. Keegan, B. Zhan, J. Wei, Z. Liu, J. Lee, R. Kundu, R. Adhikari, C.  
524 Poveda, M.J. Villar Mondragon, A.C. de Araujo Leao, J. Altieri Rivera, P.M. Gillespie, U. Strych, P.J. Hotez,  
525 M.E. Bottazzi, SARS-CoV-2 RBD219-N1C1: A Yeast-Expressed SARS-CoV-2 Recombinant Receptor-  
526 Binding Domain Candidate Vaccine Stimulates Virus Neutralizing Antibodies and T-cell Immunity in Mice,  
527 *bioRxiv*, (2020) 2020.2011.2004.367359.
- 528 [26] CTRI, Biological E's novel Covid-19 vaccine of SARS-CoV-2 for protection against Covid-19 disease.,  
529 in, 2020.
- 530 [27] A. Saluja, R.M. Fesinmeyer, S. Hogan, D.N. Brems, Y.R. Gokarn, Diffusion and sedimentation  
531 interaction parameters for measuring the second virial coefficient and their utility as predictors of  
532 protein aggregation, *Biophys J*, 99 (2010) 2657-2665.
- 533 [28] D.L. Sackett, J. Wolff, Nile red as a polarity-sensitive fluorescent probe of hydrophobic protein  
534 surfaces, *Anal Biochem*, 167 (1987) 228-234.
- 535 [29] A. Kato, S. Nakai, Hydrophobicity determined by a fluorescence probe method and its correlation  
536 with surface properties of proteins, *Biochim Biophys Acta*, 624 (1980) 13-20.
- 537 [30] P.J. Hotez, M.E. Bottazzi, S.K. Singh, P.J. Brindley, S. Kamhawi, Will COVID-19 become the next  
538 neglected tropical disease?, *PLoS neglected tropical diseases*, 14 (2020) e0008271.
- 539 [31] WHO, DRAFT landscape of COVID-19 candidate vaccines, in, 2020.
- 540 [32] T.N.Y. Times, Coronavirus Vaccine Tracker,  
541 <https://www.nytimes.com/interactive/2020/science/coronavirus-vaccine-tracker.html>, (2020).
- 542 [33] J.C. Pollet, W. H.; Strych U., Recombinant Protein Vaccines, a Proven Approach Against Coronavirus  
543 Pandemics., Preprints (2020).
- 544 [34] C. Keech, G. Albert, I. Cho, A. Robertson, P. Reed, S. Neal, J.S. Plested, M. Zhu, S. Cloney-Clark, H.  
545 Zhou, G. Smith, N. Patel, M.B. Frieman, R.E. Haupt, J. Logue, M. McGrath, S. Weston, P.A. Piedra, C.  
546 Desai, K. Callahan, M. Lewis, P. Price-Abbott, N. Formica, V. Shinde, L. Fries, J.D. Lickliter, P. Griffin, B.  
547 Wilkinson, G.M. Glenn, Phase 1-2 Trial of a SARS-CoV-2 Recombinant Spike Protein Nanoparticle Vaccine,  
548 *The New England journal of medicine*, (2020).
- 549 [35] Clinicaltrials.gov, A Study Looking at the Efficacy, Immune Response, and Safety of a COVID-19  
550 Vaccine in Adults at Risk for SARS-CoV-2, in, 2020.
- 551 [36] Clinicaltrials.gov, Evaluation of the Safety and Immunogenicity of a SARS-CoV-2 rS Nanoparticle  
552 Vaccine With/Without Matrix-M Adjuvant, in, 2020.
- 553 [37] Clinicaltrials.gov, Clinical Study of Recombinant Novel Coronavirus Vaccine, in, 2020.
- 554 [38] CHICTR, A randomized, double-blind, placebo-controlled phase III clinical trial of the effectiveness  
555 and safety of inoculation of recombinant new coronavirus vaccine (CHO cells) in the prevention of  
556 COVID-19 in people 18 years and older, in, 2020.
- 557 [39] CHICTR, Randomized double blind, placebo controlled phase I trial for anti novel coronavirus  
558 pneumonia (COVID-19) recombinant vaccine (Sf9), in, 2020.
- 559 [40] Clinicaltrials.gov, A Study to Evaluate the Safety and Immunogenicity of COVID-19 (AdimrSC-2f)  
560 Vaccine, in, 2020.

- 561 [41] L. Dai, T. Zheng, K. Xu, Y. Han, L. Xu, E. Huang, Y. An, Y. Cheng, S. Li, M. Liu, M. Yang, Y. Li, H. Cheng,  
562 Y. Yuan, W. Zhang, C. Ke, G. Wong, J. Qi, C. Qin, J. Yan, G.F. Gao, A Universal Design of Betacoronavirus  
563 Vaccines against COVID-19, MERS, and SARS, *Cell*, 182 (2020) 722-733 e711.
- 564 [42] L. Liu, P. Wang, M.S. Nair, J. Yu, M. Rapp, Q. Wang, Y. Luo, J.F. Chan, V. Sahi, A. Figueroa, X.V. Guo, G.  
565 Cerutti, J. Bimela, J. Gorman, T. Zhou, Z. Chen, K.Y. Yuen, P.D. Kwong, J.G. Sodroski, M.T. Yin, Z. Sheng, Y.  
566 Huang, L. Shapiro, D.D. Ho, Potent neutralizing antibodies against multiple epitopes on SARS-CoV-2 spike,  
567 *Nature*, 584 (2020) 450-456.
- 568 [43] W.H. Chen, M.P. Nyon, M.V. Poongavanam, Z. Liu, A.B. Biter, R.T. Kundu, U. Strych, P.J. Hotez, M.E.  
569 Bottazzi, Process Characterization and Biophysical Analysis for a Yeast-Expressed *Phlebotomus papatasi*  
570 Salivary Protein (PpSP15) as a *Leishmania* Vaccine Candidate, *J Pharm Sci*, (2020).
- 571 [44] E. Curti, C.A. Seid, E. Hudspeth, L. Center, W. Rezende, J. Pollet, C. Kwityn, M. Hammond, R.K.  
572 Matsunami, D.A. Engler, P.J. Hotez, M. Elena Bottazzi, Optimization and revision of the production  
573 process of the *Necator americanus* glutathione S-transferase 1 (Na-GST-1), the lead hookworm vaccine  
574 recombinant protein candidate, *Hum Vaccin Immunother*, 10 (2014) 1914-1925.
- 575 [45] C.O. Barnes, C.A. Jette, M.E. Abernathy, K.A. Dam, S.R. Esswein, H.B. Gristick, A.G. Malyutin, N.G.  
576 Sharaf, K.E. Huey-Tubman, Y.E. Lee, D.F. Robbiani, M.C. Nussenzweig, A.P. West, Jr., P.J. Bjorkman, SARS-  
577 CoV-2 neutralizing antibody structures inform therapeutic strategies, *Nature*, 588 (2020) 682-687.
- 578 [46] D. Pinto, Y.J. Park, M. Beltramello, A.C. Walls, M.A. Tortorici, S. Bianchi, S. Jaconi, K. Culap, F. Zatta,  
579 A. De Marco, A. Peter, B. Guarino, R. Spreafico, E. Cameroni, J.B. Case, R.E. Chen, C. Havenar-Daughton,  
580 G. Snell, A. Telenti, H.W. Virgin, A. Lanzavecchia, M.S. Diamond, K. Fink, D. Veessler, D. Corti, Cross-  
581 neutralization of SARS-CoV-2 by a human monoclonal SARS-CoV antibody, *Nature*, 583 (2020) 290-295.
- 582 [47] W. Vervecken, V. Kaigorodov, N. Callewaert, S. Geysens, K. De Vusser, R. Contreras, In vivo synthesis  
583 of mammalian-like, hybrid-type N-glycans in *Pichia pastoris*, *Appl Environ Microbiol*, 70 (2004) 2639-  
584 2646.
- 585 [48] Y. Watanabe, J.D. Allen, D. Wrapp, J.S. McLellan, M. Crispin, Site-specific glycan analysis of the  
586 SARS-CoV-2 spike, *Science*, 369 (2020) 330-333.
- 587 [49] T. Johannssen, B. Lepenies, Glycan-Based Cell Targeting To Modulate Immune Responses, *Trends*  
588 *Biotechnol*, 35 (2017) 334-346.
- 589 [50] J.S. Lam, M.K. Mansour, C.A. Specht, S.M. Levitz, A model vaccine exploiting fungal mannosylation  
590 to increase antigen immunogenicity, *J Immunol*, 175 (2005) 7496-7503.
- 591 [51] S. Jiang, C. Hillyer, L. Du, Neutralizing Antibodies against SARS-CoV-2 and Other Human  
592 Coronaviruses, *Trends Immunol*, 41 (2020) 355-359.
- 593 [52] Z. Zhu, S. Chakraborti, Y. He, A. Roberts, T. Sheahan, X. Xiao, L.E. Hensley, P. Prabakaran, B. Rockx,  
594 I.A. Sidorov, D. Corti, L. Vogel, Y. Feng, J.O. Kim, L.F. Wang, R. Baric, A. Lanzavecchia, K.M. Curtis, G.J.  
595 Nabel, K. Subbarao, S. Jiang, D.S. Dimitrov, Potent cross-reactive neutralization of SARS coronavirus  
596 isolates by human monoclonal antibodies, *Proc Natl Acad Sci U S A*, 104 (2007) 12123-12128.
- 597 [53] Y. Weisblum, F. Schmidt, F. Zhang, J. DaSilva, D. Poston, J.C. Lorenzi, F. Muecksch, M. Rutkowska,  
598 H.H. Hoffmann, E. Michailidis, C. Gaebler, M. Agudelo, A. Cho, Z. Wang, A. Gazumyan, M. Cipolla, L.  
599 Luchsinger, C.D. Hillyer, M. Caskey, D.F. Robbiani, C.M. Rice, M.C. Nussenzweig, T. Hatziioannou, P.D.  
600 Bieniasz, Escape from neutralizing antibodies by SARS-CoV-2 spike protein variants, *Elife*, 9 (2020).
- 601 [54] A.J. Greaney, A.N. Loes, K.H.D. Crawford, T.N. Starr, K.D. Malone, H.Y. Chu, J.D. Bloom,  
602 Comprehensive mapping of mutations in the SARS-CoV-2 receptor-binding domain that affect  
603 recognition by polyclonal human plasma antibodies, *Cell Host Microbe*, (2021).
- 604 [55] D. Zhou, W. Dejnirattisai, P. Supasa, C. Liu, A.J. Mentzer, H.M. Ginn, Y. Zhao, H.M.E. Duyvesteyn, A.  
605 Tuekprakhon, R. Nutalai, B. Wang, G.C. Paesen, C. Lopez-Camacho, J. Slon-Campos, B. Hallis, N. Coombes,  
606 K. Bewley, S. Charlton, T.S. Walter, D. Skelly, S.F. Lumley, C. Dold, R. Levin, T. Dong, A.J. Pollard, J.C.  
607 Knight, D. Crook, T. Lambe, E. Clutterbuck, S. Bibi, A. Flaxman, M. Bittaye, S. Belij-Rammerstorfer, S.  
608 Gilbert, W. James, M.W. Carroll, P. Klenerman, E. Barnes, S.J. Dunachie, E.E. Fry, J. Mongkolkeha, J. Ren,

609 D.I. Stuart, G.R. Screaton, Evidence of escape of SARS-CoV-2 variant B.1.351 from natural and vaccine  
610 induced sera, *Cell*.  
611 [56] Y. Wan, J. Shang, R. Graham, R.S. Baric, F. Li, Receptor Recognition by the Novel Coronavirus from  
612 Wuhan: an Analysis Based on Decade-Long Structural Studies of SARS Coronavirus, *J Virol*, 94 (2020).  
613

614 **Table**

615

616 **Table 1.** Assessment of the fermentation supernatants for clones RBD219-219, RBD219-N1, and RBD219-  
 617 N1C1. \*Fermentation yield was measured by probing the RBD with the same specific antibody followed  
 618 by densitometry (Supplementary Figure S1). FS: fermentation supernatant; WB: western blot.

| <b>Molecule</b> | <b>Fermentation yield*<br/>(mg RBD/L of FS)</b> | <b>Level of<br/>Impurity<br/>on SDS-<br/>PAGE</b> | <b>Hyperglycosylation on<br/>WB</b> | <b>Dimer formation on<br/>WB</b> |
|-----------------|-------------------------------------------------|---------------------------------------------------|-------------------------------------|----------------------------------|
| RBD219-WT       | 142 ± 8                                         | High                                              | Yes                                 | Yes                              |
| RBD219-N1       | 50 ± 13                                         | Mid                                               | No                                  | Yes                              |
| RBD219-N1C1     | 280 ± 70                                        | Low                                               | No                                  | Yes                              |

619

620

621

622

623 **Table 2.** Aggregation assessment by diffusion interaction parameter ( $K_D$ ) using DLS and hydrophobicity  
 624 assessment by extrinsic fluorescence.

| <b>Protein</b> | <b>Dynamic light scattering</b>                                    | <b>Extrinsic fluorescence</b>                              |                                                               |
|----------------|--------------------------------------------------------------------|------------------------------------------------------------|---------------------------------------------------------------|
|                | <b>Diffusion interaction<br/>parameter <math>K_D</math> (mL/g)</b> | <b>Peak wavelength<br/><math>\lambda_{max}</math> (nm)</b> | <b>Surface hydrophobicity<br/><math>S_0</math> (RFU*L/mg)</b> |
| RBD219-WT      | -14.9                                                              | 658                                                        | 3.1                                                           |
| RBD219-N1+His  | -29.7                                                              | 642                                                        | 9.8                                                           |
| RBD219-N1C1    | -16.3                                                              | 658                                                        | 2.8                                                           |
| BSA            | N/A                                                                | 634                                                        | 53.4                                                          |
| Lysozyme       | N/A                                                                | 662                                                        | 1.1                                                           |

625

626

627 **Figure Legends**

628

629 Figure 1. Sequence comparison among RBD219-WT, RBD219-N1, and RBD219-N1C1. The deleted  
630 asparagine in the first glycosylation site is highlighted in red while the mutated cysteine (to alanine) is  
631 highlighted in green. The receptor-binding motif is highlighted in blue [21, 56].

632

633 **Figure 2.** Coomassie Blue stained SDS-PAGE and western blot probed with anti-SARS-CoV-2 Spike rabbit antibody.  
634 (A) SDS-PAGE gel of 10  $\mu$ L fermentation supernatant for tagged-free RBD219-WT, RBD219-N1, and RBD219-N1C1;  
635 (B) Coomassie Blue stained SDS-PAGE gel of 3  $\mu$ g purified RBDs or western blot of 1.5  $\mu$ g of the purified RBDs under  
636 non-reduced and reduced conditions. (C) SDS-PAGE of 3  $\mu$ g PNGase-F treated purified RBDs; please note that the  
637 37 kDa band observed on the PNGase-F treated gel is the N-glycosidase PNGase-F enzyme.

638

639 **Figure 3.** Dynamic light scattering results for RBD219-WT, RBD219-N1+His, and RBD219-N1C1. (A)  
640 Measured Stokes radii and molecular weights. (B) Diffusion coefficient vs. concentration plot to evaluate  
641 the diffusion interaction parameter (C) Stability study to monitor the changes of the molecular weight.

642

643 **Figure 4.** Extrinsic fluorescence results for RBD219-WT, RBD219-N1+His, and RBD219-N1C1. (A)  
644 Excitation wavelength scan to obtain the peak emission wavelength  $\lambda_{max}$ ; (B) Fluorescence intensity vs  
645 concentration plot to evaluate surface hydrophobicity.

646

647 **Figure 5.** Circular dichroism data for RBD219-WT, RBD219-N1+His, and RBD219-N1C1. (A) Circular  
648 dichroism spectra; Thermal map of circular dichroism spectra for (B) RBD219-WT, (C) RBD219-N1+His,  
649 and (D) RBD219-N1C1. Melting profile of (E) RBD219-WT, (F) RBD219-N1+His, and (G) RBD219-N1C1.

650

651 **Figure 6.** Thermal shift assay for RBD219-WT, RBD219-N1+His, and RBD219-N1C1. (A) the fluorescence-  
652 temperature plot and (B) the derivative fluorescence-temperature plot.

653

654 **Figure 7.** ACE-2 binding study of RBD219-WT, RBD219-N1+His, and RBD219-N1C1.

655

656

Figure 1

```
RBD219-WT NITNLCPFGEVFNATRFASVYAWNRKRISNCVADYSVLYNSASFSTFKCYGVSP TKLNDL 60
RBD219-N1 -ITNLCPFGEVFNATRFASVYAWNRKRISNCVADYSVLYNSASFSTFKCYGVSP TKLNDL 59
RBD219-N1C1 -ITNLCPFGEVFNATRFASVYAWNRKRISNCVADYSVLYNSASFSTFKCYGVSP TKLNDL 59
*****

RBD219-WT CFTNVYADSFVIRGDEVRQIAPGQTGKIADYNYKLPDDFTGCVIAWNSNNLDSKVG GNYN 120
RBD219-N1 CFTNVYADSFVIRGDEVRQIAPGQTGKIADYNYKLPDDFTGCVIAWNSNNLDSKVG GNYN 119
RBD219-N1C1 CFTNVYADSFVIRGDEVRQIAPGQTGKIADYNYKLPDDFTGCVIAWNSNNLDSKVG GNYN 119
*****

RBD219-WT YLYRLFRKSNLKPFERDISTEIQAGSTPCNGVEGFNCYFPLQSYGFQPTNGVGYQP YRV 180
RBD219-N1 YLYRLFRKSNLKPFERDISTEIQAGSTPCNGVEGFNCYFPLQSYGFQPTNGVGYQP YRV 179
RBD219-N1C1 YLYRLFRKSNLKPFERDISTEIQAGSTPCNGVEGFNCYFPLQSYGFQPTNGVGYQP YRV 179
*****

RBD219-WT VVLSFELLHAPATVCGPKKSTNLVKNKCVNFNFNGLTGT 219
RBD219-N1 VVLSFELLHAPATVCGPKKSTNLVKNKCVNFNFNGLTGT 218
RBD219-N1C1 VVLSFELLHAPATVCGPKKSTNLVKNKAVNFNFNGLTGT 218
*****
```

Figure 2

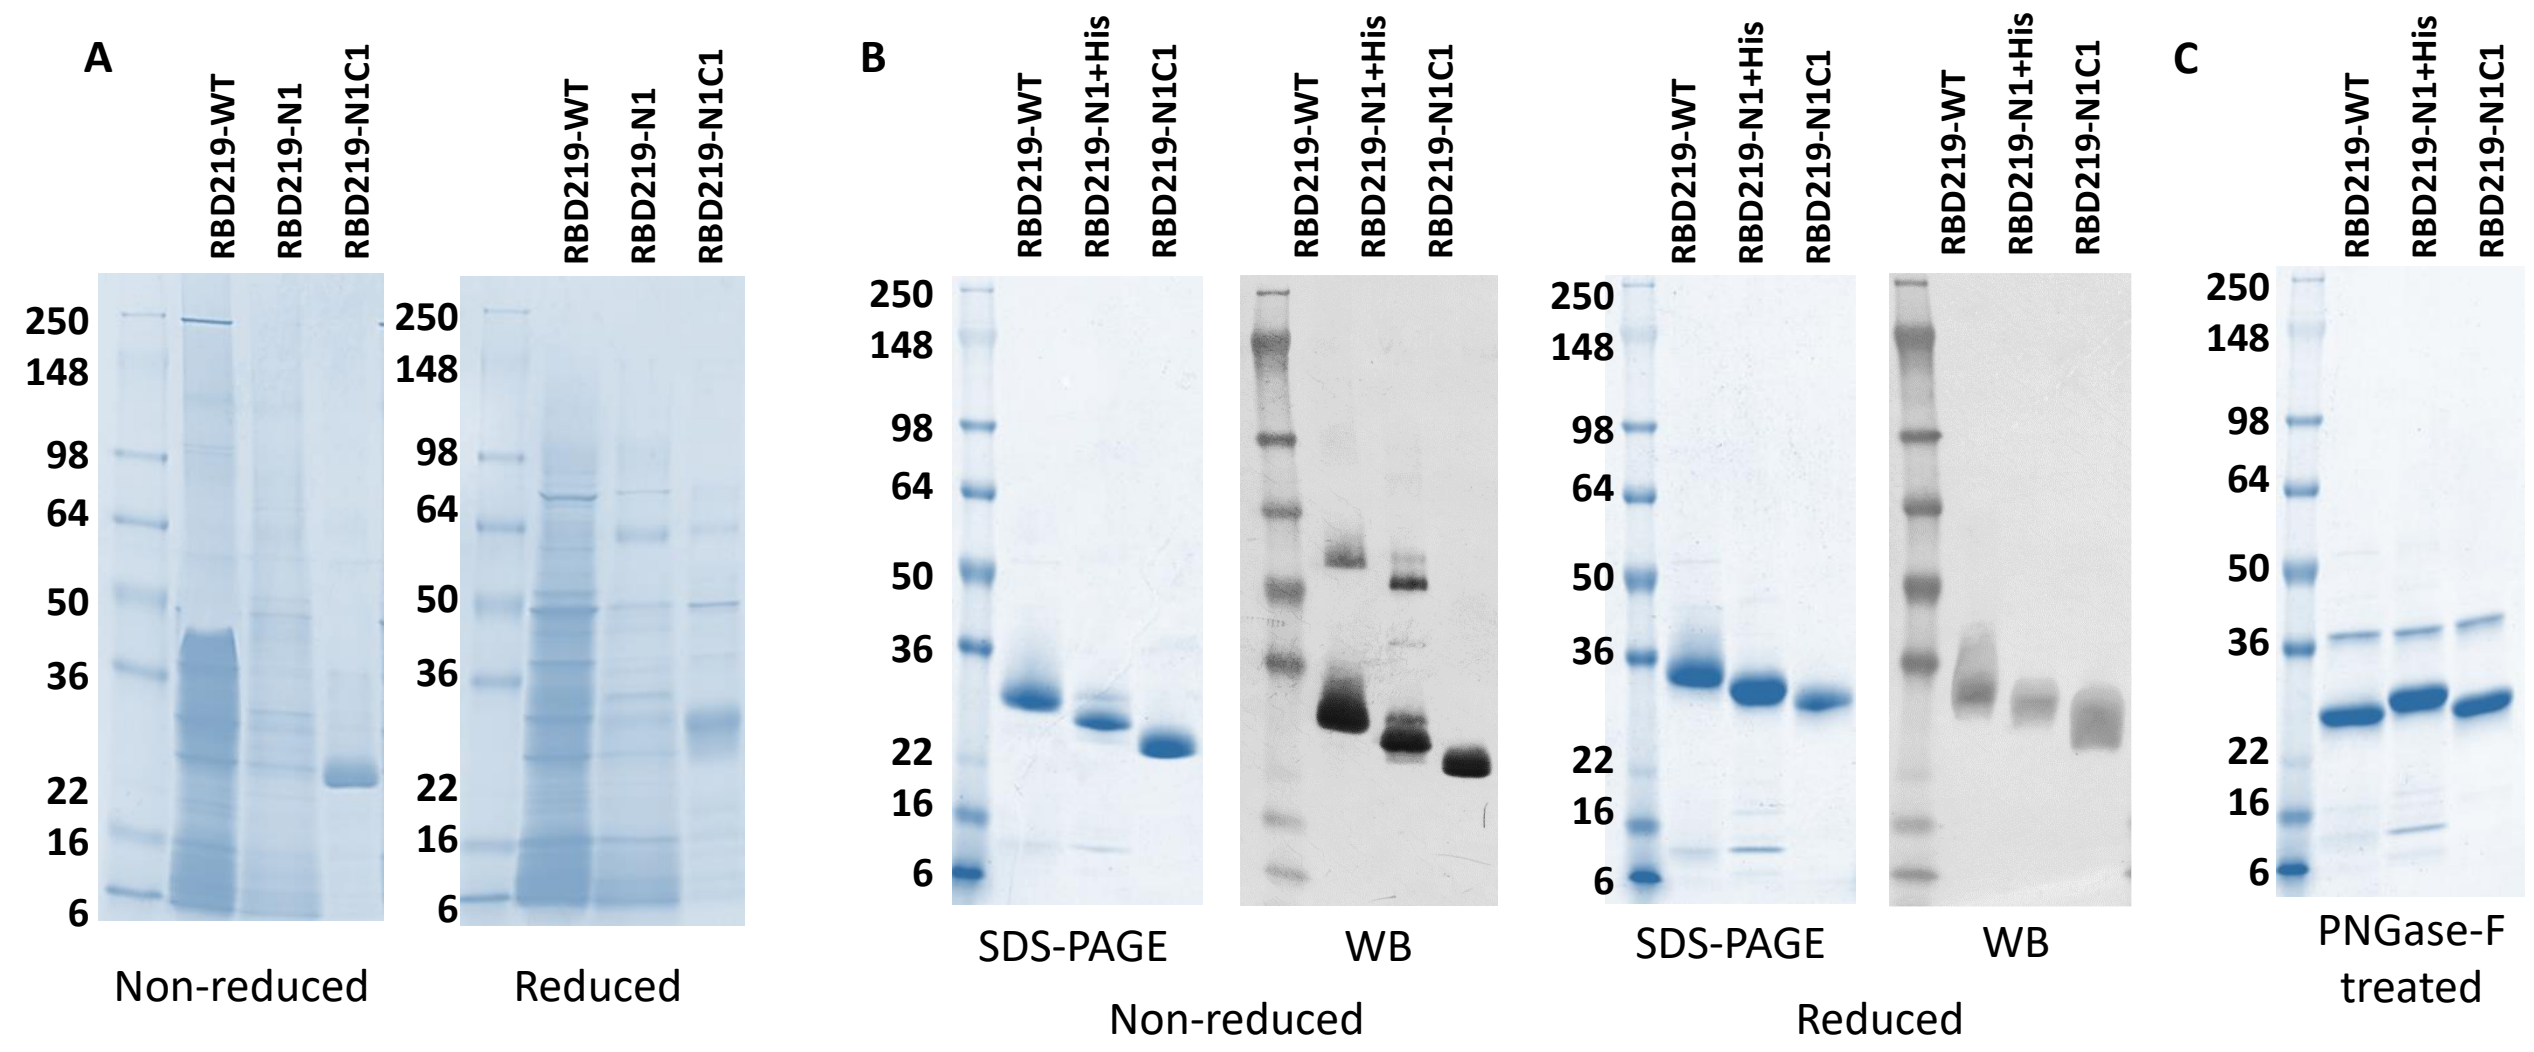

Figure 3

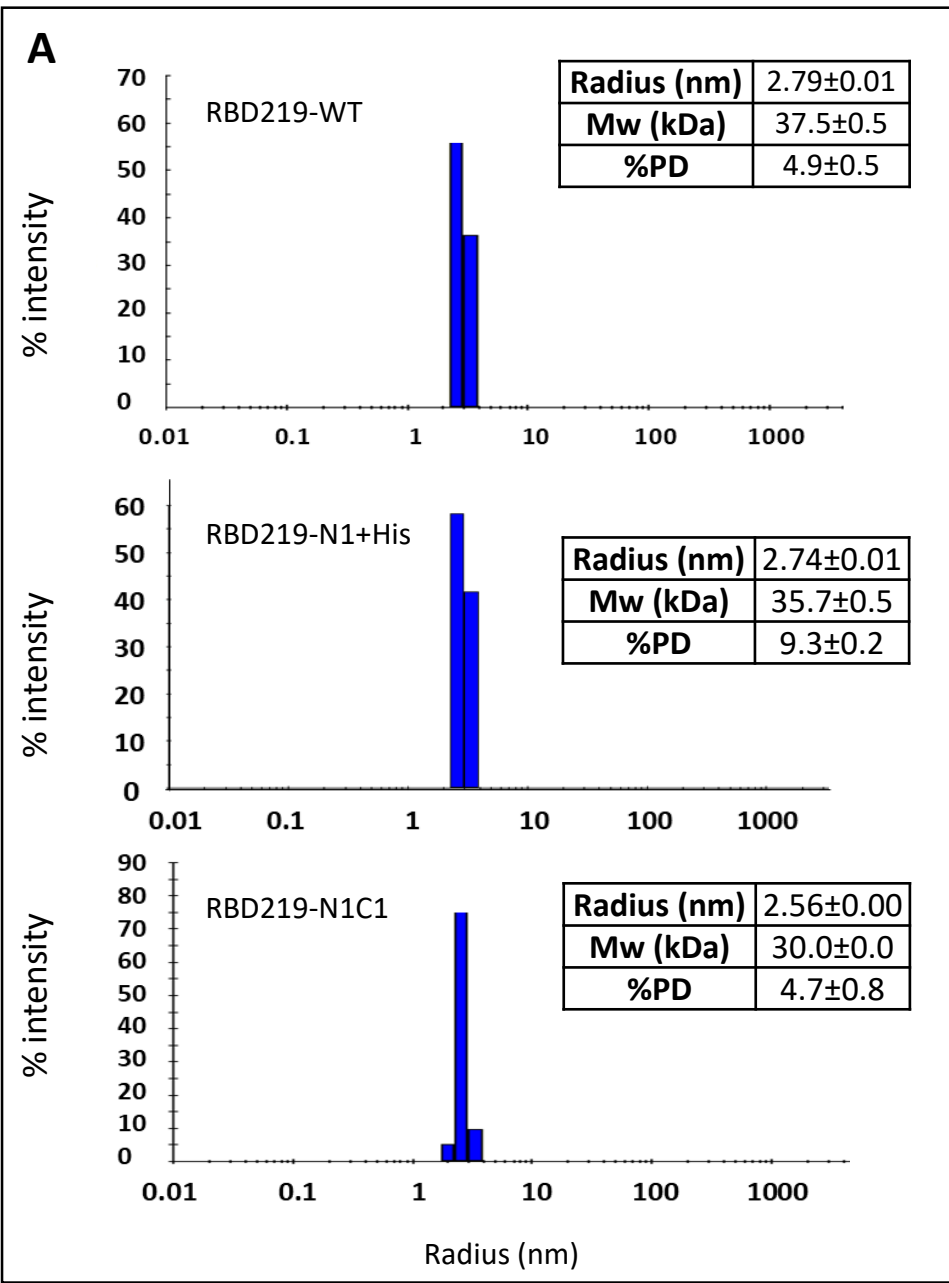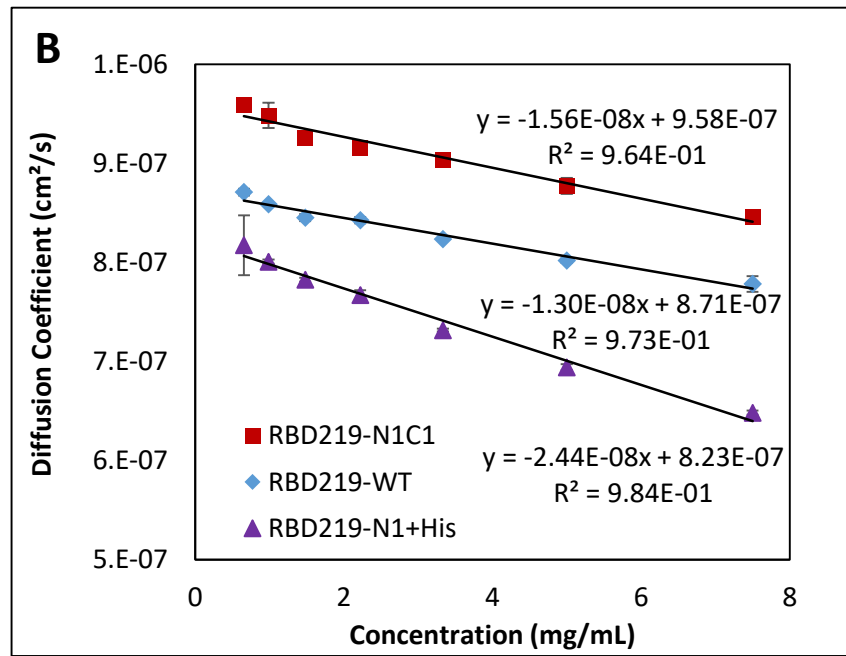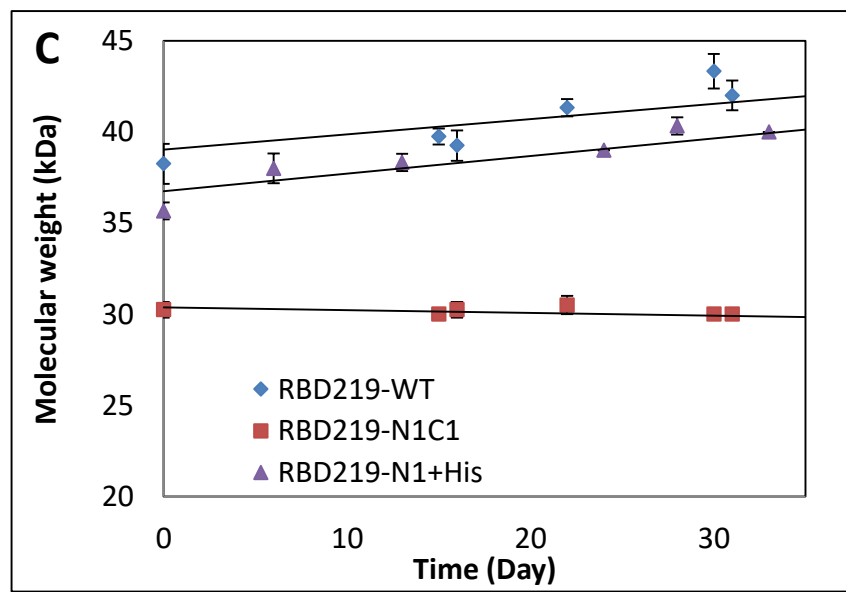



Figure 4

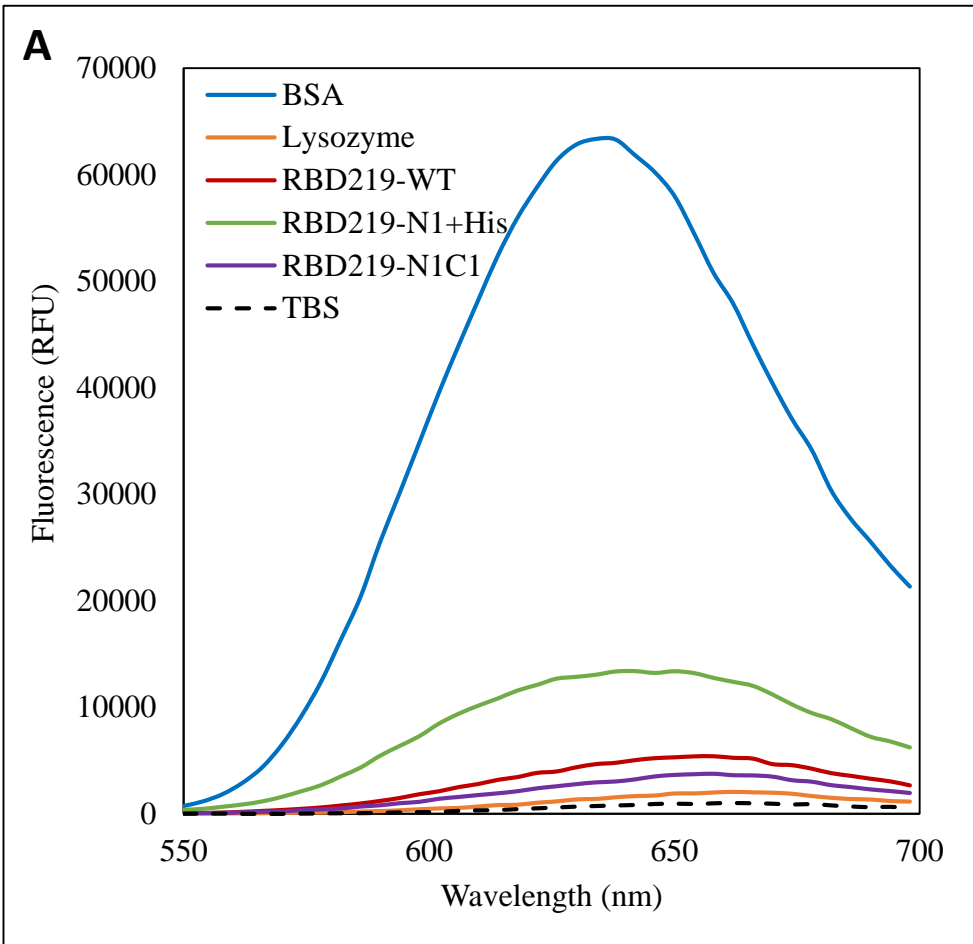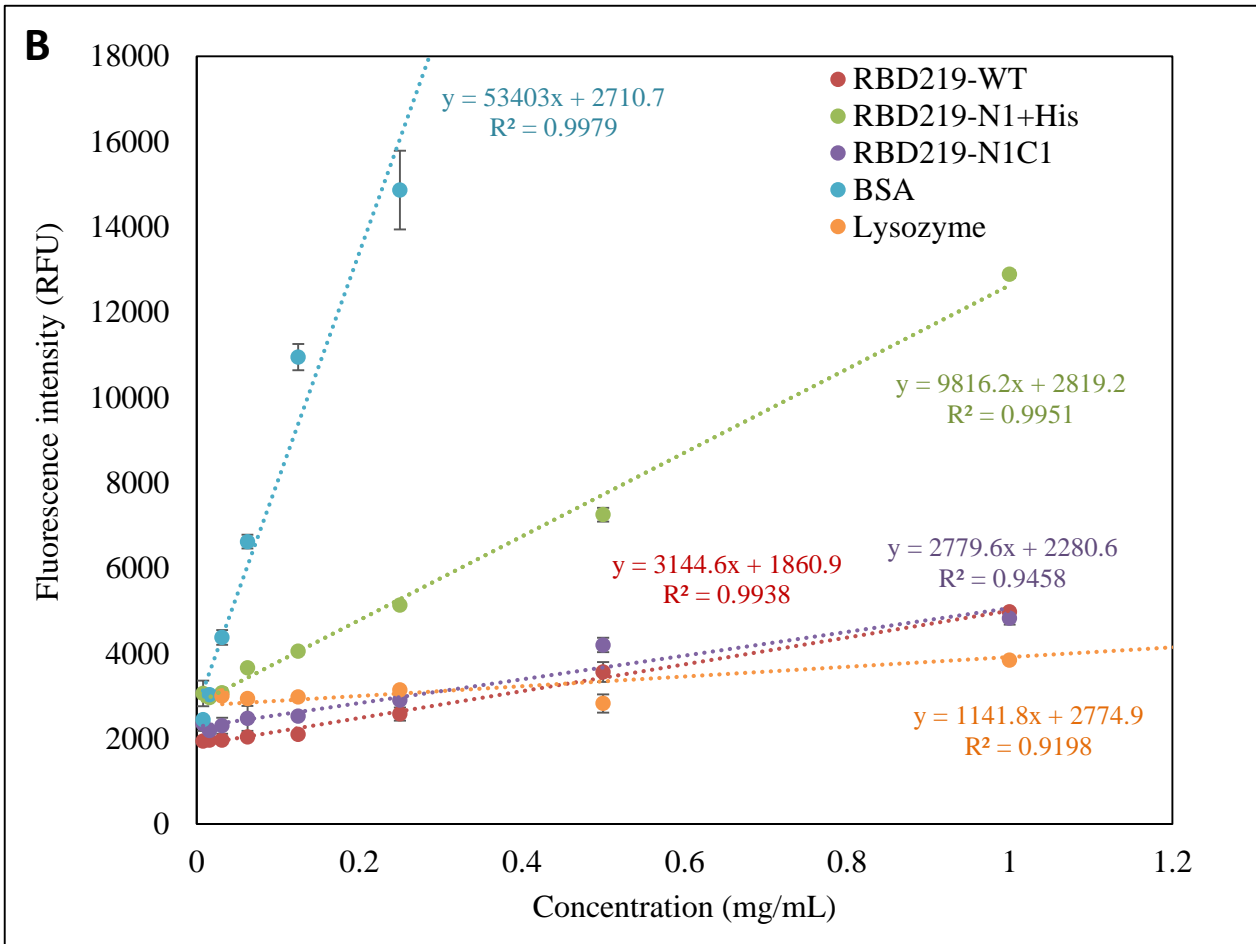

Figure 5

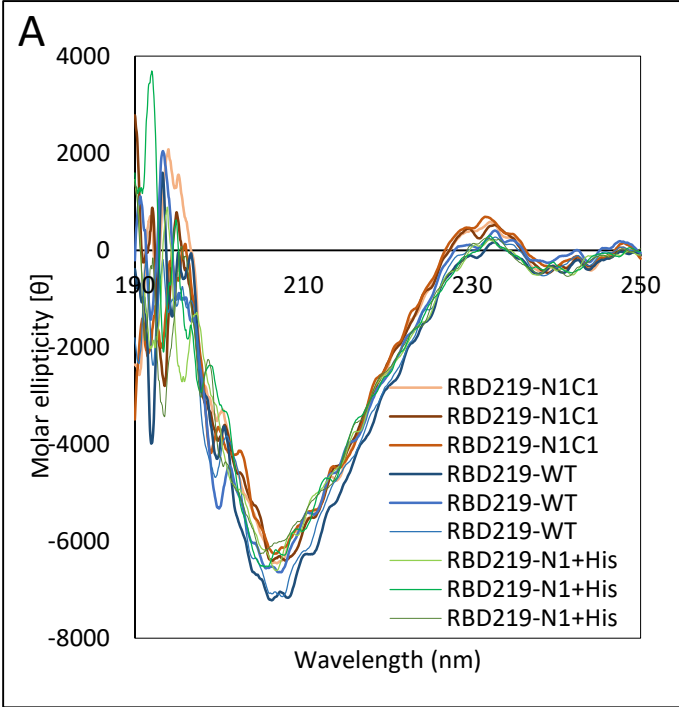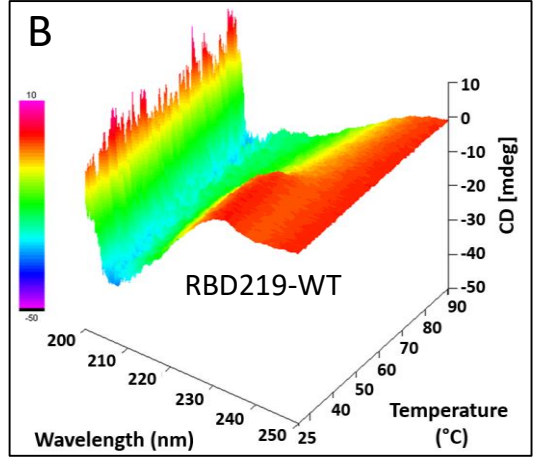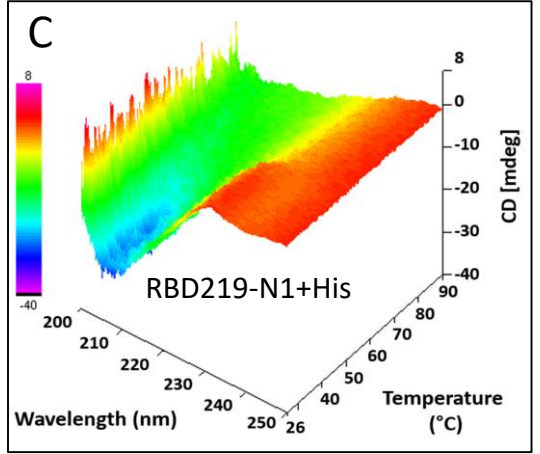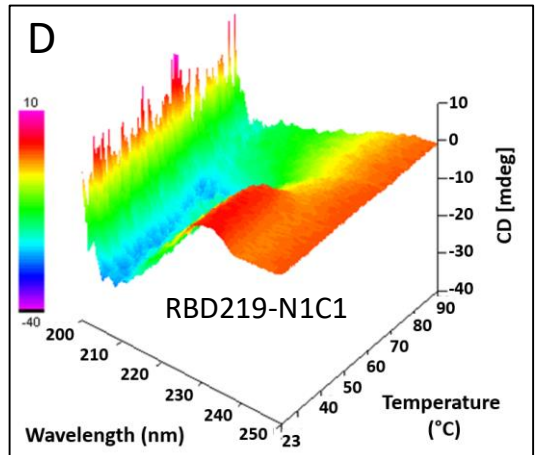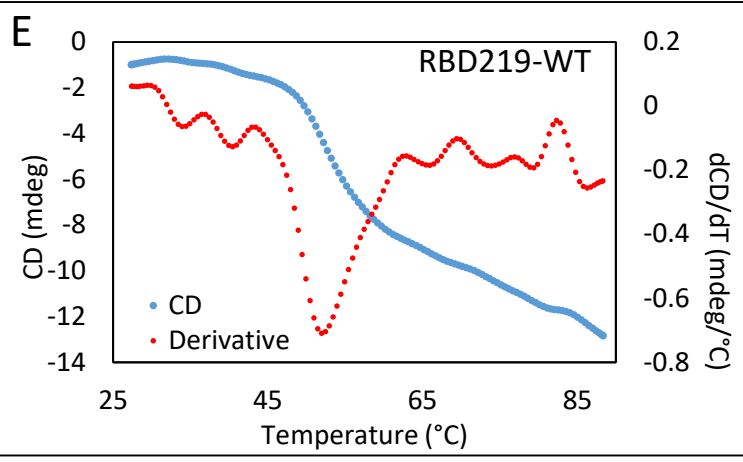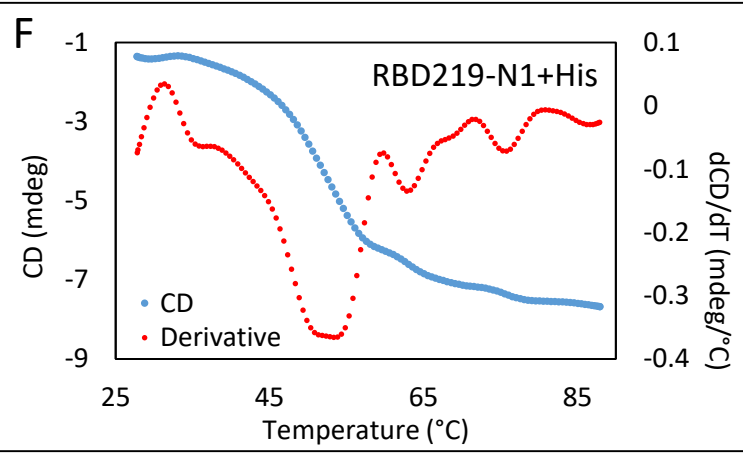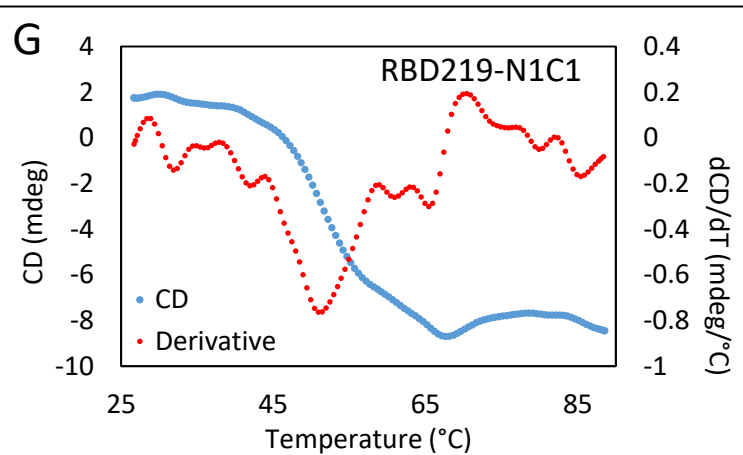

Figure 6

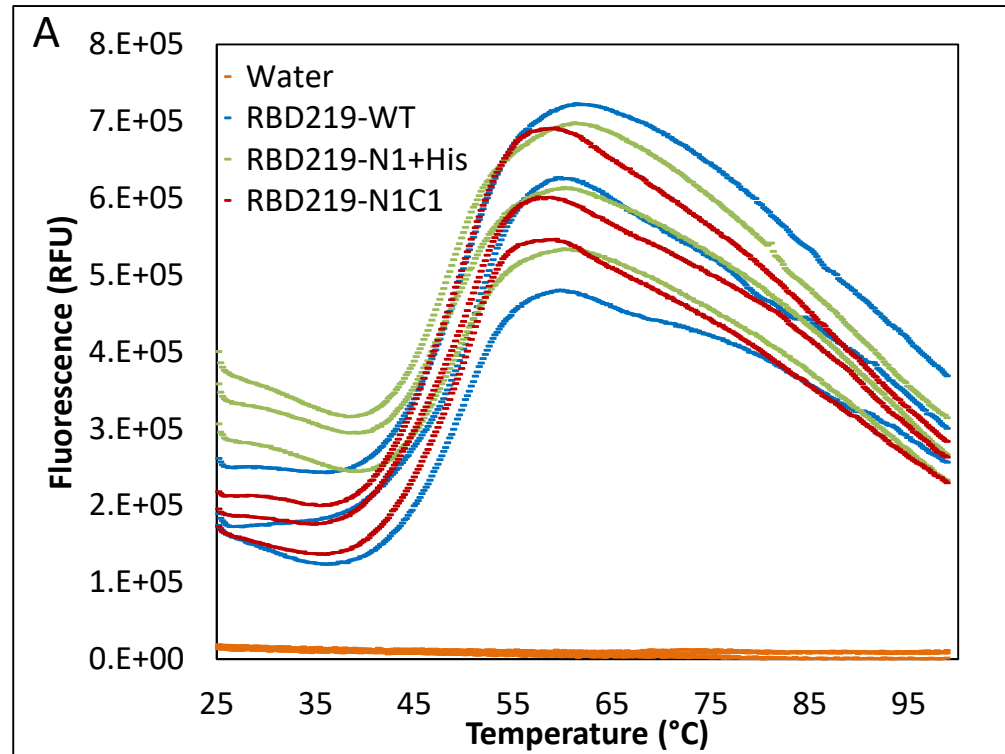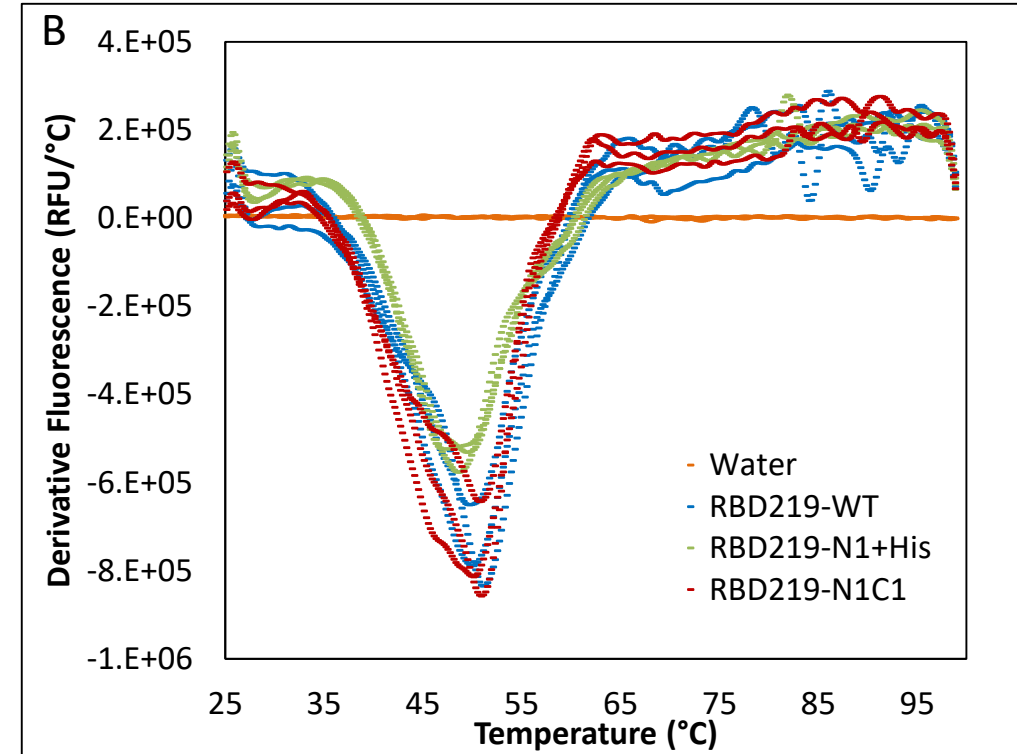

Figure 7

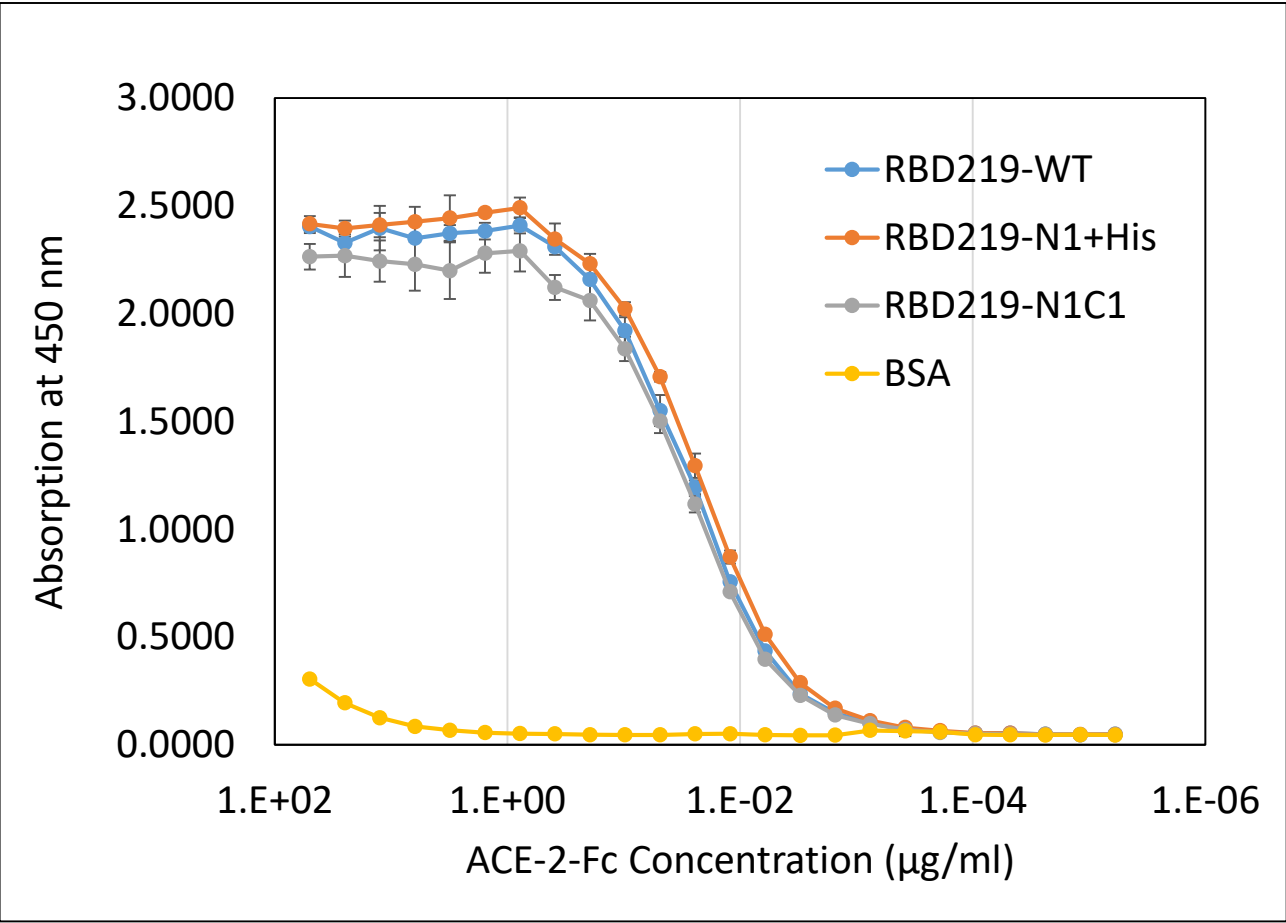

Source: https://www.biorxiv.org/content/10.1101/2020.11.09.373449v2.full.pdf
